# 1 Testing for ancient selection using cross-population allele 2 frequency differentiation

3 Fernando Racimo<sup>1,\*</sup>

4 1 Department of Integrative Biology, University of California, Berkeley, CA, USA

5 \* E-mail: [fernandoracimo@gmail.com](mailto:fernandoracimo@gmail.com)

## 6 1 Abstract

7 A powerful way to detect selection in a population is by modeling local allele frequency changes in a  
8 particular region of the genome under scenarios of selection and neutrality, and finding which model is  
9 most compatible with the data. Chen et al. [1] developed a composite likelihood method called XP-CLR  
10 that uses an outgroup population to detect departures from neutrality which could be compatible with  
11 hard or soft sweeps, at linked sites near a beneficial allele. However, this method is most sensitive to recent  
12 selection and may miss selective events that happened a long time ago. To overcome this, we developed  
13 an extension of XP-CLR that jointly models the behavior of a selected allele in a three-population tree.  
14 Our method - called 3P-CLR - outperforms XP-CLR when testing for selection that occurred before two  
15 populations split from each other, and can distinguish between those events and events that occurred  
16 specifically in each of the populations after the split. We applied our new test to population genomic  
17 data from the 1000 Genomes Project, to search for selective sweeps that occurred before the split of  
18 Africans and Eurasians, but after their split from Neanderthals, and that could have presumably led to  
19 the fixation of modern-human-specific phenotypes. We also searched for sweep events that occurred in  
20 East Asians, Europeans and the ancestors of both populations, after their split from Africans.

## 21 2 Introduction

22 Genetic hitchhiking will distort allele frequency patterns at regions of the genome linked to a beneficial  
23 allele that is rising in frequency [2]. This is known as a selective sweep. If the sweep is restricted to a  
24 particular population and does not affect other closely related populations, one can detect such an event  
25 by looking for extreme patterns of localized population differentiation, like high values of  $F_{st}$  at a specific  
26 locus [3]. This and other related statistics have in fact been used to scan the genomes of present-day

humans from different populations, so as to detect signals of recent positive selection [4–7].

Once it became possible to sequence entire genomes of archaic humans (like Neanderthals) [8–10], researchers also began to search for selective sweeps that occurred in the ancestral population of all present-day humans. For example, ref. [8] searched for genomic regions with a depletion of derived alleles in a low-coverage Neanderthal genome, relative to what would be expected given the derived allele frequency in present-day humans. This is a pattern that would be consistent with a sweep in present-day humans. Later on, ref. [10] developed a hidden Markov model (HMM) that could identify regions where Neanderthals fall outside of all present-day human variation (also called “external regions”), and are therefore likely to have been affected by ancient sweeps in early modern humans. They applied their method to a high-coverage Neanderthal genome. Then, they ranked these regions by their genetic length, to find segments that were extremely long, and therefore highly compatible with a selective sweep. Finally, ref. [11] used summary statistics calculated in the neighborhood of sites that were ancestral in archaic humans but fixed derived in all or almost all present-day humans, to test if any of these sites could be compatible with a selective sweep model. While these methods harnessed different summaries of the patterns of differentiation left by sweeps, they did not attempt to explicitly model the process by which these patterns are generated over time.

Chen et al. [1] developed a method called XP-CLR, which is designed to test for selection in one population after its split from a second, outgroup, population  $t_{AB}$  generations ago. It does so by modeling the evolutionary trajectory of an allele under linked selection and under neutrality, and then comparing the likelihood of the data under each of the two models. The method detects local allele frequency differences that are compatible with the linked selection model [2], along windows of the genome.

XP-CLR is a powerful test for detecting selective events restricted to one population. However, it provides little information about when these events happened, as it models all sweeps as if they had immediately occurred in the present generation. Additionally, if one is interested in selective sweeps that took place before two populations  $a$  and  $b$  split from each other, one would have to run XP-CLR separately on each population, with a third outgroup population  $c$  that split from the ancestor of  $a$  and  $b$   $t_{ABC}$  generations ago (with  $t_{ABC} > t_{AB}$ ). Then, one would need to check that the signal of selection appears in both tests. This may miss important information about correlated allele frequency changes shared by  $a$  and  $b$ , but not by  $c$ , limiting the power to detect ancient events.

To overcome this, we developed an extension of XP-CLR that jointly models the behavior of an allele

in all 3 populations, to detect selective events that occurred before or after the closest two populations split from each other. Below we briefly review the modeling framework of XP-CLR and describe our new test, which we call 3P-CLR. In the Results, we show this method outperforms XP-CLR when testing for selection that occurred before the split of two populations, and can distinguish between those events and events that occurred after the split, unlike XP-CLR. We then apply the method to population genomic data from the 1000 Genomes Project [12], to search for selective sweep events that occurred before the split of Africans and Eurasians, but after their split from Neanderthals. We also use it to search for selective sweeps that occurred in the Eurasian ancestral population, and to distinguish those from events that occurred specifically in East Asians or specifically in Europeans.

## 3 Methods

### 3.1 XP-CLR

First, we review the procedure used by XP-CLR to model the evolution of allele frequency changes of two populations  $a$  and  $b$  that split from each other  $t_{AB}$  generations ago (Figure 1.A). For neutral SNPs, Chen et al. [1] use an approximation to the Wright-Fisher diffusion dynamics [13]. Namely, the frequency of a SNP in a population  $a$  ( $p_A$ ) in the present is treated as a random variable governed by a normal distribution with mean equal to the frequency in the ancestral population ( $\beta$ ) and variance proportional to the drift time  $\omega$  from the ancestral to the present population:

$$p_A|\beta \sim N(\beta, \omega\beta(1-\beta)) \quad (1)$$

where  $\omega = t_{AB}/(2N_e)$  and  $N_e$  is the effective size of population A.

If a SNP is segregating in both populations - i.e. has not hit the boundaries of fixation or extinction - this process is time-reversible. Thus, one can model the frequency of the SNP in population  $a$  with a normal distribution having mean equal to the frequency in population  $b$  and variance proportional to the sum of the drift time ( $\omega$ ) between  $a$  and the ancestral population, and the drift time between  $b$  and the ancestral population ( $\psi$ ):

$$p_A|p_B \sim N(p_B, (\omega + \psi)p_B(1-p_B)) \quad (2)$$

For SNPs that are linked to a beneficial allele that has undergone a sweep in population  $a$  only, Chen et al. [1] model the allele as evolving neutrally until the present and then apply a transformation to the normal distribution that depends on the distance to the selected allele  $r$  and the strength of selection  $s$  [14, 15]. Let  $c = 1 - q_0^{r/2}$  where  $q_0$  is the frequency of the beneficial allele in population A before the sweep begins. The frequency of a neutral allele is expected to increase from  $p$  to  $1 - c + cp$  if the allele is linked to the beneficial allele, and this occurs with probability equal to the frequency of the neutral allele ( $p$ ) before the sweep begins. Otherwise, the frequency of the neutral allele is expected to decrease from  $p$  to  $cp$ . This leads to the following transformation of the normal distribution:

$$f(p_A|p_B, r, s, \omega, \psi) = \frac{1}{\sqrt{2\pi}\sigma} \frac{p_A + c - 1}{c^2} e^{-\frac{(p_A + c - 1 - cp_B)^2}{2c^2\sigma^2}} I_{[1-c, 1]}(p_A) + \frac{1}{\sqrt{2\pi}\sigma} \frac{c - p_A}{c^2} e^{-\frac{(p_A - cp_B)^2}{2c^2\sigma^2}} I_{[0, c]}(p_A) \quad (3)$$

where  $\sigma^2 = (\omega + \psi)p_b(1 - p_b)$  and  $I_{[x, y]}(z)$  is 1 on the interval  $[x, y]$  and 0 otherwise.

For  $s \rightarrow 0$  or  $r \gg s$ , this distribution converges to the neutral case. Let  $\mathbf{v}$  be the vector of all drift times that are relevant to the scenario we are studying. In this case, it will be equal to  $(\omega, \psi)$  but in more complex cases below, it may include additional drift times. Let  $\mathbf{r}$  be the vector of recombination fractions between the beneficial alleles and each of the SNPs within a window of arbitrary size. We can then calculate the product of likelihoods over all  $k$  SNPs in that window for either the neutral or the linked selection model, after binomial sampling of alleles from the population frequency and conditioning on the event that the allele is segregating in the population:

$$CL_{XP-CLR}(\mathbf{r}, \mathbf{v}, s) = \prod_{j=1}^k \frac{\int_0^1 f(p_A^j|p_B^j, \mathbf{v}, s, r^j) \binom{n}{m_j} (p_A^j)^{m_j} (1 - p_A^j)^{n-m_j} dp_A^j}{\int_0^1 f(p_A^j|p_B^j, \mathbf{v}, s, r^j) dp_A^j} \quad (4)$$

We note that the denominator in the above equation is not explicitly stated in ref. [1] for ease of notation, but appears in the published online implementation of the method. Because we are ignoring the correlation in frequencies produced by linkage, this is a composite likelihood [16, 17]. Finally, we obtain a composite likelihood ratio statistic  $S_{XP-CLR}$  of the hypothesis of linked selection over the hypothesis of neutrality:

$$S_{XP-CLR} = 2[\sup_{\mathbf{r}, \mathbf{v}, s} \log(CL_{XP-CLR}(\mathbf{r}, \mathbf{v}, s)) - \sup_{\mathbf{v}} \log(CL_{XP-CLR}(\mathbf{r}, \mathbf{v}, s = 0))] \quad (5)$$

For ease of computation, Chen et al. [1] assume that  $\mathbf{r}$  is given (via a recombination map) and we will do so too. Furthermore, they empirically estimate  $\mathbf{v}$  using  $F_2$  statistics [18] calculated over the whole genome, and assume selection is not strong or frequent enough to affect their genome-wide values. Because we are interested in selection over long time scales, the new methods we will present below are optimally run using drift times calculated from population split times and effective population sizes estimated using model-based demographic inference methods, like  $\partial a \partial i$  [19] or fastsimcoal2 [20].

### 3.2 3P-CLR

We are interested in the case where a selective event occurred more anciently than the split of two populations ( $a$  and  $b$ ) from each other, but more recently than their split from a third population  $c$  (Figure 1.B). We begin by modeling  $p_A$  and  $p_B$  as evolving from an unknown common ancestral frequency  $\beta$ :

$$p_A | \beta, \omega \sim N(\beta, \omega \beta(1 - \beta)) \quad (6)$$

$$p_B | \beta, \psi \sim N(\beta, \psi \beta(1 - \beta)) \quad (7)$$

Let  $\chi$  be the drift time separating the most recent common ancestor of  $a$  and  $b$  from the most recent common ancestor of  $a$ ,  $b$  and  $c$ . Additionally, let  $\nu$  be the drift time separating population  $c$  in the present from the most recent common ancestor of  $a$ ,  $b$  and  $c$ . Given these parameters, we can treat  $\beta$  as an additional random variable that either evolves neutrally or is linked to a selected allele that swept immediately more anciently than the split of  $a$  and  $b$ . In both cases, the distribution of  $\beta$  will depend on the frequency of the allele in population  $c$  ( $p_C$ ) in the present. In the neutral case:

$$f_{neut}(\beta | p_C, \nu, \chi) = N(p_C, (\nu + \chi)p_C(1 - p_C)) \quad (8)$$

In the linked selection case:

$$f_{sel}(\beta | p_C, \nu, \chi, r, s) = \frac{1}{\sqrt{2\pi\kappa}} \frac{\beta + c - 1}{c^2} e^{-\frac{(\beta + c - 1 - cp_C)^2}{2c^2\kappa^2}} I_{[1-c, 1]}(\beta) + \frac{1}{\sqrt{2\pi\kappa}} \frac{c - \beta}{c^2} e^{-\frac{(\beta - cp_C)^2}{2c^2\kappa^2}} I_{[0, c]}(\beta) \quad (9)$$

where  $\kappa^2 = (\nu + \chi)p_C(1 - p_C)$

The frequencies in  $a$  and  $b$  given the frequency in  $c$  can be obtained by integrating  $\beta$  out. This leads

121 to a density function that models selection in the ancestral population of  $a$  and  $b$ .

$$f(p_A, p_B | p_C, \mathbf{v}, r, s) = \int_0^1 f_{neut}(p_A | \beta, \omega) f_{neut}(p_B | \beta, \psi) f_{sel}(\beta | p_C, \nu, \chi, r, s) d\beta \quad (10)$$

122 Additionally, formula 10 can be modified to test for selection that occurred specifically in one of the  
123 terminal branches that lead to  $a$  or  $b$  (Figures 1.C and 1.D), rather than in the ancestral population of  $a$   
124 and  $b$ . For example, the density of frequencies for a scenario of selection in the branch leading to  $a$  can  
125 be written as:

$$f(p_A, p_B | p_C, \mathbf{v}, r, s) = \int_0^1 f_{sel}(p_A | \beta, \omega, r, s) f_{neut}(p_B | \beta, \psi) f_{neut}(\beta | p_C, \nu, \chi) d\beta \quad (11)$$

126 We will henceforth refer to the version of 3P-CLR that is tailored to detect selection in the internal  
127 branch that is ancestral to  $a$  and  $b$  as 3P-CLR(Int). In turn, the versions of 3P-CLR that are designed to  
128 detect selection in each of the daughter populations will be designated as 3P-CLR(A) and 3P-CLR(B).

129 We can now calculate the probability density of specific allele frequencies in populations  $a$  and  $b$ , given  
130 that we observe  $m_C$  derived alleles in a sample of size  $n_C$  from population  $c$ :

$$f(p_A, p_B | m_C, \mathbf{v}, r, s) = \int_0^1 f(p_A, p_B | p_C, \mathbf{v}, r, s) f(p_C | m_C) dp_C \quad (12)$$

131 where  $B(x, y)$  is the Beta function and

$$f(p_C | m_C) = \frac{1}{B(m_C, n_C - m_C + 1)} p_C^{m_C - 1} (1 - p_C)^{n_C - m_C} \quad (13)$$

132 Conditioning on the event that the site is segregating in the population, we can then calculate the  
133 probability of observing  $m_A$  and  $m_B$  derived alleles in a sample of size  $n_A$  from population  $a$  and a sample  
134 of size  $n_B$  from population  $b$ , respectively, given that we observe  $m_C$  derived alleles in a sample of size  
135  $n_C$  from population  $c$ , using binomial sampling:

$$P(m_A, m_B | m_C, \mathbf{v}, r, s) = \frac{\int_0^1 \int_0^1 P(m_A | p_A) P(m_B | p_B) f(p_A, p_B | m_C, \mathbf{v}, r, s) dp_A dp_B}{\int_0^1 \int_0^1 f(p_A, p_B | m_C, \mathbf{v}, r, s) dp_A dp_B} \quad (14)$$

136 where

$$P(m_A|p_A) = \binom{n_A}{m_A} p_A^{m_A} (1 - p_A)^{n_A - m_A} \quad (15)$$

137 and

$$P(m_B|p_B) = \binom{n_B}{m_B} p_B^{m_B} (1 - p_B)^{n_B - m_B} \quad (16)$$

138 This allows us to calculate a composite likelihood of the derived allele counts in  $a$  and  $b$  given the  
139 derived allele counts in  $c$ :

$$CL_{3P-CLR}(\mathbf{r}, \mathbf{v}, s) = \prod_{j=1}^k P(m_A^j, m_B^j | m_C^j, \mathbf{v}, r^j, s) \quad (17)$$

140 As before, we can use this composite likelihood to produce a composite likelihood ratio statistic  
141 that can be calculated over regions of the genome to test the hypothesis of linked selection centered  
142 on a particular locus against the hypothesis of neutrality. Due to computational costs in numerical  
143 integration, we skip the sampling step for population  $c$  (formula 13) in our implementation of 3P-CLR.  
144 In other words, we assume  $p_C = m_C/n_C$ , but this is also assumed in XP-CLR when computing its  
145 corresponding outgroup frequency. We implemented our method in a freely available C++ program that  
146 can be downloaded from here:

147 <https://github.com/ferracimo> [WILL POST IT AFTER PUBLICATION]

## 148 4 Results

### 149 4.1 Simulations

150 We generated simulations in SLiM [21] to test the performance of XP-CLR and 3P-CLR in a three-  
151 population scenario. We focused specifically on the performance of 3P-CLR(Int) in detecting ancient  
152 selective events that occurred in the ancestral branch of two sister populations. We assumed that the  
153 population history had been correctly estimated by the researcher (i.e. the drift parameters and popu-  
154 lation topology were known). First, we simulated scenarios in which a beneficial mutation arose in the  
155 ancestor of populations  $a$  and  $b$ , before their split from each other but after their split from  $c$  (Table  
156 1). Although both XP-CLR and 3P-CLR are sensitive to partial or soft sweeps (as they do not rely on

extended patterns of homozygosity [1]), we required the allele to have fixed before the split (at time  $t_{ab}$ ) to ensure that the allele had not been lost before it, and also to ensure that the sweep was restricted to the internal branch of the tree. We fixed the effective size of all three populations at  $N_e = 10,000$ . Each simulation consisted in a 5 cM region and the beneficial mutation occurred in the center of this region. The mutation rate was set at  $2.5 \times 10^{-8}$  per generation and the recombination rate was set at  $10^{-8}$  per generation.

To make a fair comparison to 3P-CLR(Int), and given that XP-CLR is a two-population test, we applied XP-CLR in two ways. First, we pretended population  $b$  was not sampled, and so the "test" panel consisted of individuals from  $a$  only, while the "outgroup" consisted of individuals from  $c$ . In the second implementation (which we call "XP-CLR-avg"), we used the same outgroup panel, but pretended that individuals from  $a$  and  $b$  were pooled into a single panel, and this pooled panel was the "test". The window size was set at 0.5 cM and the space between the center of each window was set at 600 SNPs. To speed up computation, and because we are largely interested in comparing the relative performance of the three tests under different scenarios, we used only 20 randomly chosen SNPs per window in all tests. We note, however, that the performance of all three tests can be improved by using more SNPs per window.

Figure 2 shows receiver operating characteristic (ROC) curves comparing the sensitivity and specificity of 3P-CLR(Int), XP-CLR and XP-CLR-avg in the first six demographic scenarios described in Table 1. Each ROC curve was made from 100 simulations under selection (with  $s = 0.1$  for the central mutation) and 100 simulations under neutrality (with  $s = 0$  and no fixation required). In each simulation, 100 individuals were sampled from population  $a$ , 100 from population  $b$  and 10 from the outgroup population  $c$ . This emulates a situation in which only a few individuals have been sequenced from the outgroup, while large numbers of sequences are available from the tests (e.g. two populations of present-day humans). For each simulation, we took the maximum value at a region in the neighborhood of the central mutation ( $\pm 0.5$  cM) and used those values to compute ROC curves under the two models.

When the split times are recent or moderately ancient (models A to D), 3P-CLR(Int) outperforms the two versions of XP-CLR. When the split times are very ancient (models E and F), none of the tests perform well. The root mean squared error (RMSE) of the genetic distance between the true selected site and the highest scored window is comparable across tests in all six scenarios (Figure S2). Finally, Figures S1 and S3 show the ROC curves and RMSE plots, respectively, for a case in which 100 individuals were



187 sampled from all three populations (including the outgroup), with similar results.

188 Importantly, the usefulness of 3P-CLR(Int) resides not just in its performance at detecting selective  
189 sweeps in the ancestral population, but in its specific sensitivity to that particular type of events. Because  
190 the test relies on correlated allele frequency differences in both population *a* and population *b* (relative to  
191 the outgroup), selective sweeps that are specific to only one of the populations will not lead to high 3P-  
192 CLR(Int) scores. Figure 3 shows ROC curves in two scenarios in which a selective sweep event occurred  
193 only in population *a* (Models I and J in Table 1), using 100 sampled individuals from each of the 3  
194 populations. Here, XP-CLR performs well, but 3P-CLR(Int) shows almost no sensitivity to the recent  
195 sweep, under reasonable specificity cutoffs. For example, in Model I, at a specificity of 95%, XP-CLR has  
196 80% sensitivity, while at the same specificity, 3P-CLR(Int) only has 14% sensitivity. One can compare  
197 this to the same demographic scenario but with selection occurring in the ancestral population (Model  
198 C, Figure S1), where at 95% specificity, XP-CLR has 69% sensitivity, while 3P-CLR has 83% sensitivity.

## 199 4.2 Selection in Eurasians

200 We first applied 3P-CLR to modern human data from the 1000 Genomes Project [12]. We used the  
201 African-American recombination map [22] to convert physical distances into genetic distances. We focused  
202 on two populations (Europeans and East Asians), using Africans as the outgroup population (Figure  
203 S4.A). We randomly sampled 100 individuals from each population and obtained sample derived allele  
204 frequencies every 10 SNPs in the genome. We then calculated likelihood ratio statistics by a sliding  
205 window approach, where we sampled a "central SNP" once every 20 SNPs. The central SNP in each  
206 window was the candidate beneficial SNP for that window. We set the window size to 0.25 cM, and  
207 randomly sampled 100 SNPs from each window, centered around the candidate beneficial SNP. In each  
208 window, we calculated 3P-CLR to test for selection at three different branches of the population tree:  
209 the terminal branch leading to Europeans (3P-CLR Europe), the terminal branch leading to East Asians  
210 (3P-CLR East Asia) and the ancestral branch of Europeans and East Asians (3P-CLR Eurasia). Results  
211 are shown in Figure 4. For each scan, we selected the windows in the top 99.9% quantile of scores and  
212 merged them together if they were contiguous. Tables 2, 3 and 4 show the top hits for Europeans, East  
213 Asians and the ancestral Eurasian branch, respectively

214 We observe several genes that have been identified in previous selection scans. In the East Asian  
215 branch, one of the top hits is *EDAR*. This gene codes for a protein involved in hair thickness and incisor

tooth morphology [23,24]. It has been repeatedly identified in earlier selections scans as having undergone a sweep in East Asians [25, 26].

Furthermore, 3P-CLR allows us to narrow down on the specific time at which selection occurred in the history of particular populations. For example, ref. [1] performed a scan of the genomes of East Asians using XP-CLR with Africans as the outgroup, and identified a number of genes as being under selection [1]. 3P-CLR confirms this signal in several of these loci when looking specifically at the East Asian branch: *CYP26B1*, *EMX1*, *SPR*, *SFXN5*, *SLC30A9*, *PPARA*, *PKDREJ*, *GTSE1*, *TRMU*, *CELSR1*, *PINX1*, *XKR6*, *CD226*, *ACD*, *PARD6A*, *GFOD2*, *RANBP10*, *TSNAXIP1*, *CENPT*, *THAP11*, *NUTF2*, *CDH16*, *RRAD*, *FAM96B*, *CES2*, *CBFB*, *C16orf70*, *TRADD*, *FBXL8*, *HSF4*, *NOL3*, *EXOC3L1*, *E2F4*, *ELMO3*, *LRRC29*, *FHOD1*, *SLC9A5*, *PLEKHG4*, *LRRC36*, *ZDHHC1*, *HSD11B2*, *AtP6V0D1*, *AGRP*, *FAM65A*, *CTCF* and *RLTPR*. However, when applied to the ancestral Eurasian branch, 3P-CLR finds some genes that were previously found in the XP-CLR analysis of East Asians, but that are not among the top hits in 3P-CLR applied to the East Asian branch: *COMMD3*, *BMI1*, *SPAG6*, *CD226*, *SLC30A9*, *LONP2*, *SIAH1*, *ABCC11* and *ABCC12*. This suggests selection in these regions occurred earlier, i.e. before the European-East Asian split. Figure 5 shows a comparison between the 3P-CLR scores for the three branches in the region containing genes *BMI1* (a proto-oncogene [27]) and *SPAG6* (involved in sperm motility [28]). In that figure, the score within each window was standardized using its chromosome-wide mean and standard deviation, to make a fair comparison. One can observe that the signal of Eurasia-specific selection is evidently stronger than the other two signals.

Other selective events that 3P-CLR infers to have occurred in Eurasians include the region containing *HERC2* and *OCA2*, which are major determinants of eye color [29–31]. There is also evidence that these genes underwent selection more recently in the history of Europeans [32], which could suggest an extended period of selection - perhaps influenced by migrations between Asia and Europe - or repeated selective events at the same locus.

When running 3P-CLR to look for selection specific to Europe, we find that *TYRP1* and *MYO5A*, which play a role in human skin pigmentation [33–36], are among the top hits. Both of these genes have been previously found to be under strong selection in Europe [37], using a statistic called iHS, which measures extended patterns of homozygosity that are characteristic of selective sweeps. Interestingly, a change in the gene *TYRP1* has also been found to cause a blonde hair phenotype in Melanesians [38].

### 245 4.3 Selection in ancestral modern humans

246 We applied 3P-CLR to modern human data combined with recently sequenced archaic human data  
247 [10]. We sought to find selective events that occurred in modern humans after their split from archaic  
248 groups. We used the combined Neanderthal and Denisovan high-coverage genomes [9,10] as the outgroup  
249 population, and, for our two test populations, we randomly sampled 100 Eurasian genomes and 100  
250 African genomes from the 1000 Genomes data (Figure S4.B). We used previously estimated drift times  
251 as fixed parameters [10], and tested for selective events that occurred more anciently than the split of  
252 Africans and Eurasians, but more recently than the split from Neanderthals. We run 3P-CLR using 0.25  
253 cM windows as above, but also verified that the density of scores was robust to the choice of window  
254 size and spacing (Figure S5). As before, we selected the top 99.9% windows and merged them together  
255 if they were contiguous. Table 5 and Figure S6 show the top hits. To find putative candidates for the  
256 beneficial variants in each region, we queried the catalogs of modern human-specific high-frequency or  
257 fixed derived changes that are ancestral in the Neanderthal and/or the Denisova genomes [10,39].

258 We observe several genes that have been identified in previous scans that looked for selection in modern  
259 humans after their split from archaic groups [8,10]: *SIPA1L1*, *ANAPC10*, *ABCE1*, *RASA1*, *CCNH*,  
260 *KCNJ3*, *HBP1*, *COG5*, *GPR22*, *DUS4L*, *BCAP29*, *CALDPS2*, *RNF133*, *RNF148*, *FAM172A*, *POU5F2*,  
261 *FGF7*, *RABGAP1*, *GPR21*, *STRBP*, *SMURF1*, *GABRA2*, *ALMS1*, *PVRL3*, *EHBP1*, *VPS54*, *OTX1*,  
262 *UGP2*, *HCN1*, *GTDC1*, *ZEB2*, *OIT3*, *USP54*, *MYOZ1* and *DPYD*. One of our strongest candidate genes  
263 among these is *ANAPC10*. This gene is a core subunit of the cyclosome, is involved in progression through  
264 the cell cycle [40], and may play a role in oocyte maturation and human T-lymphotropic virus infection  
265 (KEGG pathway [41]). *ANAPC10* is noteworthy because it was found to be significantly differentially  
266 expressed in humans compared to other great apes and macaques: it is up-regulated in the testes [42].  
267 The gene also contains two intronic changes that are fixed derived in modern humans, ancestral in both  
268 Neanderthals and Denisovans and that have evidence for being highly disruptive, based on a composite  
269 score that combines conservation and regulatory data (PHRED-scaled C-scores  $> 11$  [10,43]). The  
270 changes, however, appear not to lie in any obvious regulatory region [44,45].

271 We also find *ADSL* among the list of candidates. This gene is known to contain a nonsynonymous  
272 change that is fixed in all present-day humans but homozygous ancestral in the Neanderthal genome,  
273 the Denisova genome and two Neanderthal exomes [39] (Figure 6.A). It was previously identified as ly-  
274 ing in a region with strong support for positive selection in modern humans, using summary statistics

implemented in an ABC method [11]. The gene is interesting because it is one of the members of the Human Phenotype ontology category "aggression / hyperactivity" which is enriched for nonsynonymous changes that occurred in the modern human lineage after the split from archaic humans [39,46]. *ADSL* codes for adenylosuccinase, an enzyme involved in purine metabolism [47]. A deficiency of adenylosuccinase can lead to apraxia, speech deficits, delays in development and abnormal behavioral features, like hyperactivity and excessive laughter [48]. The nonsynonymous mutation (A429V) is in the C-terminal domain of the protein (Figure 6.B) and lies in a highly conserved position (primate PhastCons = 0.953; GERP score = 5.67 [43,49,50]). The ancestral amino acid is conserved across the tetrapod phylogeny, and the mutation is only three residues away from the most common causative SNP for severe adenylosuccinase deficiency [51–55]. The change has the highest probability of being disruptive to protein function, out of all the nonsynonymous modern-human-specific changes that lie in the top-scoring regions (C-score = 17.69). While *ADSL* is an interesting candidate and lies in the center of the inferred selected region (Figure 6.A), there are other genes in the region too, including *TNRC6B* and *MKL1*. *TNRC6B* may be involved in miRNA-guided gene silencing [56], while *MKL1* may play a role in smooth muscle differentiation [57], and has been associated with acute megakaryocytic leukemia [58].

*RASA1* was also a top hit in a previous scan for selection [8], and was additionally inferred to have a high Bayes factor in favor of selection in ref. [11]. The gene codes for a protein involved in the control of cellular differentiation [59]. Human diseases associated with *RASA1* include basal cell carcinoma [60] and arteriovenous malformation [61,62].

The *GABA<sub>A</sub>* gene cluster in chromosome 4p12 is also among the top regions. The genes within the putatively selected region code for three of the subunits of the *GABA<sub>A</sub>* receptor (*GABRA2*, *GABRA4*, *GABRB1*), which codes for a ligand-gated ion channel that plays a key role in synaptic inhibition in the central nervous system (see review by ref. [63]). *GABRA2* is significantly associated with the risk of alcohol dependence in humans [64], perception of pain [65] and asthma [66]. In turn, *GABRA4* is associated with autism risk [67,68].

Two other candidate genes that may be involved in brain development are *FOXP1* and *CADPS2*. *FOXP1* was not identified in any of the previous selection scans, and codes for a protein called forkhead box G1, which plays an important role during brain development. Mutations in this gene have been associated with a slow-down in brain growth during childhood resulting in microcephaly, which in turn causes various intellectual disabilities [69,70]. *CADPS2* was identified in [8] as a candidate for selection,

and has been associated with autism [71]. The gene has been suggested to be specifically important in the evolution of all modern humans, as it was not found to be selected earlier in great apes or later in particular modern human populations [72].

Finally, we find a signal of selection in a region containing the gene *EHBP1* and *OTX1*. This region was identified in both of the two previous scans for modern human selection [8, 10]. *EHBP1* codes for a protein involved in endocytic trafficking [73] and has been associated with prostate cancer [74]. *OTX1* is a homeobox family gene that may play a role in brain development [75]. Interestingly, *EHBP1* contains a single-nucleotide intronic change (chr2:63206488) that is almost fixed in all present-day humans and homozygous ancestral in Neanderthal and Denisova [10]. This change is also predicted to be highly disruptive (C-score = 13.1) and lies in a position that is extremely conserved across primates (PhastCons = 0.942), mammals (PhastCons = 1) and vertebrates (PhastCons = 1). The change is 18 bp away from the nearest splice site and overlaps a VISTA conserved enhancer region (element 1874) [76], which suggests a putative regulatory role for the change.

#### 4.4 Modern human-specific high-frequency changes in GWAS catalog

We overlapped the genome-wide association studies (GWAS) database [77, 78] with the list of fixed or high-frequency modern human-specific changes that are ancestral in archaic humans [10] and that are located within our top putatively selected regions in modern humans (Table 6). None of the resulting SNPs are completely fixed derived, because GWAS can only yield associations from sites that are segregating. Among these SNPs, the one with the highest probability of being disruptive (rs10003958, C-score = 16.58, Gerp score = 6.07) is located in a highly-conserved regulatory ("strong enhancer") region in the *RAB28* gene [44, 45] (Primate PhastCons = 0.951), and is significantly associated with obesity [79] (Figure 7.A). Interestingly, the region containing *RAB28* is inferred to have been under positive selection in both the modern human and the Eurasian ancestral branches (Tables 4, 5). In line with this evidence, the derived allele of rs10003958 is absent in archaic humans, at very high frequencies in Eurasians (> 94%), and only at moderately high frequencies in Africans (74%) (Figure 7.B).

We also find a highly disruptive SNP (rs10171434, C-score = 8.358) associated with urinary metabolites [80] and suicidal behavior in patients with mood disorders [81]. The SNP is located in an enhancer regulatory feature [44, 45] located between genes *PELI1* and *VPS54*, in the same putatively selected region as genes *EHBP1* and *OTX1* (see above). Finally, there is a highly disruptive SNP (rs731108, C-

score = 10.31) that is associated with renal cell carcinoma [82]. This SNP is also located in an enhancer regulatory feature [44,45], in an intron of *ZEB2*. In this last case, though, only the Neanderthal genome has the ancestral state, while the Denisova genome carries the modern human variant.

## 5 Discussion

We have developed a new method called 3P-CLR, which allows us to detect positive selection along the genome. The method is based on an earlier test (XP-CLR [1]) that uses linked allele frequency differences between two populations to detect population-specific selection. However, 3P-CLR can allow us to distinguish between selective events that occurred before and after the split of two populations. Our method also has some similarities to an earlier method developed by [83], which used an  $F_{st}$ -like score to detect selection ancestral to two populations. In that case, though, the authors used summary statistics and did not explicitly model the process leading to allele frequency differentiation.

We used our method to confirm previously found candidate genes in particular human populations, like *EDAR*, *TYRP1* and *HERC2*, and find some novel candidates too (Tables 2, 3, 4). Additionally, we can infer that certain genes, which were previously known to have been under selection in East Asians (like *SPAG6*), are more likely to have undergone a sweep in the population ancestral to both Europeans and East Asians than in East Asians only.

We also used 3P-CLR to detect selective events that occurred in the ancestors of modern humans, after their split from Neanderthals and Denisovans (Table 5). These events could perhaps have led to the spread of phenotypes that set modern humans apart from other hominin groups. We find several interesting candidates, like *SIPA1L1*, *ADSL*, *RASA1*, *OTX1*, *EHBP1*, *FOXP1*, *RAB28* and *ANAPC10*, some of which were previously detected using other types of methods [8,10,11].

An advantage of differentiation-based tests like XP-CLR and 3P-CLR is that, unlike other patterns detected by tests of neutrality (like extended haplotype homozygosity, [84]) that are exclusive to hard sweeps, the patterns that both XP-CLR and 3P-CLR are tailored to find are based on regional allele frequency differences between populations. These patterns can also be produced by soft sweeps from standing variation or by partial sweeps [1], and there is some evidence that the latter phenomena may have been more important than classic sweeps during human evolutionary history [85].

Another advantage of both XP-CLR and 3P-CLR is that they do not rely on an arbitrary division

of genomic space. Unlike other methods which require the partition of the genome into small windows of fixed size, our composite likelihood ratios can theoretically be computed over windows that are as big as each chromosome, while only switching the central candidate site at each window. This is because the likelihood ratios use the genetic distance to the central SNP as input. SNPs that are very far away from the central SNP will not contribute much to the likelihood function of both the neutral and the selection models, while those that are close to it will. While we heuristically limit the window size in our implementation in the interest of speed, this can be arbitrarily adjusted by the user as needed. The use of genetic distance in the likelihood function also allows us to take advantage of the spatial distribution of SNPs as an additional source of information, rather than only relying on patterns of population differentiation restricted to tightly linked SNPs.

3P-CLR also has an advantage over HMM-based selection methods, like the one implemented in ref. [10]. The likelihood ratio scores obtained from 3P-CLR can provide an idea of how credible a selection model is for a particular region, relative to the rest of the genome. The HMM-based method previously used to scan for selection in modern humans [10] can only rank putatively selected regions by genetic distance, but cannot output a statistical measure that may indicate how likely each region is to have been selected in ancient times. In contrast, 3P-CLR provides a composite likelihood ratio score, which allows for a statistically rigorous way to compare the neutral model and a specific selection model (for example, recent or ancient selection). The score also gives an idea of how much fainter the signal of ancient selection in modern humans is, relative to recent selection specific to a particular present-day population. For example, the outliers from Figure 4 have much higher scores (relative to the rest of the genome) than the outliers from Figure S6. This may be due to both the difference in time scales in the two sets of tests and to the uncertainty that comes from estimating outgroup allele frequencies using only two archaic genomes. This pattern can also be observed in Figure S7, where the densities of the scores looking for patterns of ancient selection have much shorter tails than the densities of scores looking for patterns of recent selection.

Like XP-CLR, 3P-CLR is largely robust to the underlying population history, even when this is wrongly specified, as it relies on looking for extreme allele frequency differences that are restricted to a particular region. We have noticed, however, that these types of tests may not be robust to admixture events from the outgroup population used. For example, we observe that 3P-CLR finds evidence for selection in the region containing *HYAL2* (involved in the cellular response to ultraviolet radiation),



when run in the East Asian branch. This makes sense, as a variant of this gene is known to have been pushed to high frequencies by selection specifically in East Asians. However, this variant likely came from Neanderthals via introgression [86,87]. While we do not observe that the *HYAL2* region is a top hit in either the European or the Eurasian ancestral branches, we do observe it as a top hit in the modern human ancestral branch. This is puzzling, given that the selected haplotype should not have been introduced into modern humans until after the split of Africans and non-Africans. One explanation for the appearance of this region in both the East Asian and the modern human top hits is that the introgression event could perhaps confound the signal that 3P-CLR targets, as we are assuming no admixture in our demographic model. Another possibility is that the region has suffered multiple episodes of repeated selection. Incorporating admixture into the modeling procedure may help to disentangle this pattern better, but we leave this to a future work.

A further limitation of composite likelihood ratio tests is that the composite likelihood calculated for each model under comparison is obtained from a product of individual likelihoods at each site, and so it underestimates the correlation that exists between SNPs due to linkage effects [1,16,17,88]. One way to mitigate this problem is by using corrective weights based on linkage disequilibrium (LD) statistics calculated on the outgroup population [1]. Our implementation of 3P-CLR allows the user to incorporate such weights, if appropriate LD statistics are available from the outgroup. However, in cases where these are unreliable, it may not be possible to fully correct for this (for example, when only a few unphased genomes are available, as in the case of the Neanderthal and Denisova genomes).

While 3P-CLR relies on integrating over the possible allele frequencies in the ancestors of populations  $a$  and  $b$  (formula 10), one could envision using ancient DNA to avoid this step. Thus, if enough genomes could be sampled from that ancestral population that existed in the past, one could use the sample frequency in the ancient set of genomes as a proxy for the ancestral population frequency. This may soon be possible, as several early modern human genomes have already been sequenced in recent years [89–91].

Though we have limited ourselves to a three-population model in this manuscript, it should be straightforward to expand our model to a larger number of populations, albeit with additional costs in terms of speed and memory. Our method relies on a similar framework to the demographic inference method implemented in TreeMix [92], which can estimate complex population trees that include migration events, using genome-wide data. With a more complex modeling framework, it may be possible to estimate the time and strength of selective events with better resolution, and to incorporate additional demographic



422 forces, like continuous migration between populations or pulses of admixture.

## 423 Acknowledgments

424 We thank Montgomery Slatkin, Rasmus Nielsen, Joshua Schraiber, Nicolas Duforet-Frebourg, Emilia  
425 Huerta-Sánchez, Hua Chen, Nick Patterson, David Reich, Joachim Hermisson, Graham Coop and mem-  
426 bers of the Slatkin and Nielsen labs for helpful advice and discussions. This work was supported by NIH  
427 grant R01-GM40282 to Montgomery Slatkin.

## 428 References

- 429 1. Chen H, Patterson N, Reich D (2010) Population differentiation as a test for selective sweeps.  
430 Genome research 20: 393–402.
- 431 2. Smith JM, Haigh J (1974) The hitch-hiking effect of a favourable gene. Genetical research 23:  
432 23–35.
- 433 3. Lewontin R, Krakauer J (1973) Distribution of gene frequency as a test of the theory of the selective  
434 neutrality of polymorphisms. Genetics 74: 175–195.
- 435 4. Akey JM, Zhang G, Zhang K, Jin L, Shriver MD (2002) Interrogating a high-density snp map for  
436 signatures of natural selection. Genome research 12: 1805–1814.
- 437 5. Weir BS, Cardon LR, Anderson AD, Nielsen DM, Hill WG (2005) Measures of human population  
438 structure show heterogeneity among genomic regions. Genome research 15: 1468–1476.
- 439 6. Oleksyk TK, Zhao K, Francisco M, Gilbert DA, O’Brien SJ, et al. (2008) Identifying selected  
440 regions from heterozygosity and divergence using a light-coverage genomic dataset from two human  
441 populations. PLoS One 3: e1712.
- 442 7. Yi X, Liang Y, Huerta-Sanchez E, Jin X, Cuo ZXP, et al. (2010) Sequencing of 50 human exomes  
443 reveals adaptation to high altitude. Science 329: 75–78.
- 444 8. Green RE, Krause J, Briggs AW, Maricic T, Stenzel U, et al. (2010) A draft sequence of the  
445 neandertal genome. science 328: 710–722.

- 446 9. Meyer M, Kircher M, Gansauge MT, Li H, Racimo F, et al. (2012) A high-coverage genome sequence  
447 from an archaic denisovan individual. *Science* 338: 222–226.
- 448 10. Prüfer K, Racimo F, Patterson N, Jay F, Sankararaman S, et al. (2014) The complete genome  
449 sequence of a neanderthal from the altai mountains. *Nature* 505: 43–49.
- 450 11. Racimo F, Kuhlwilm M, Slatkin M (2014) A test for ancient selective sweeps and an application  
451 to candidate sites in modern humans. *Molecular biology and evolution* 31: 3344–3358.
- 452 12. Consortium GP, et al. (2012) An integrated map of genetic variation from 1,092 human genomes.  
453 *Nature* 491: 56–65.
- 454 13. Nicholson G, Smith AV, Jónsson F, Gústafsson Ó, Stefánsson K, et al. (2002) Assessing popula-  
455 tion differentiation and isolation from single-nucleotide polymorphism data. *Journal of the Royal*  
456 *Statistical Society: Series B (Statistical Methodology)* 64: 695–715.
- 457 14. Durrett R, Schweinsberg J (2004) Approximating selective sweeps. *Theoretical population biology*  
458 66: 129–138.
- 459 15. Fay JC, Wu CI (2000) Hitchhiking under positive darwinian selection. *Genetics* 155: 1405–1413.
- 460 16. Lindsay BG (1988) Composite likelihood methods. *Contemporary Mathematics* 80: 221–39.
- 461 17. Varin C, Reid N, Firth D (2011) An overview of composite likelihood methods. *Statistica Sinica*  
462 21: 5–42.
- 463 18. Patterson N, Moorjani P, Luo Y, Mallick S, Rohland N, et al. (2012) Ancient admixture in human  
464 history. *Genetics* 192: 1065–1093.
- 465 19. Gutenkunst RN, Hernandez RD, Williamson SH, Bustamante CD (2009) Inferring the joint demo-  
466 graphic history of multiple populations from multidimensional snp frequency data. *PLoS genetics*  
467 5: e1000695.
- 468 20. Excoffier L, Dupanloup I, Huerta-Sánchez E, Sousa VC, Foll M (2013) Robust demographic infer-  
469 ence from genomic and snp data. *PLoS genetics* 9: e1003905.
- 470 21. Messer PW (2013) Slim: simulating evolution with selection and linkage. *Genetics* 194: 1037–1039.

- 471 22. Hinch AG, Tandon A, Patterson N, Song Y, Rohland N, et al. (2011) The landscape of recombina-  
472 tion in african americans. *Nature* 476: 170–175.
- 473 23. Fujimoto A, Kimura R, Ohashi J, Omi K, Yuliwulandari R, et al. (2008) A scan for genetic  
474 determinants of human hair morphology: Edar is associated with asian hair thickness. *Human*  
475 *Molecular Genetics* 17: 835–843.
- 476 24. Kimura R, Yamaguchi T, Takeda M, Kondo O, Toma T, et al. (2009) A common variation in edar  
477 is a genetic determinant of shovel-shaped incisors. *The American Journal of Human Genetics* 85:  
478 528–535.
- 479 25. Sabeti PC, Varilly P, Fry B, Lohmueller J, Hostetter E, et al. (2007) Genome-wide detection and  
480 characterization of positive selection in human populations. *Nature* 449: 913–918.
- 481 26. Grossman SR, Shylakhter I, Karlsson EK, Byrne EH, Morales S, et al. (2010) A composite of  
482 multiple signals distinguishes causal variants in regions of positive selection. *Science* 327: 883–  
483 886.
- 484 27. Siddique HR, Saleem M (2012) Role of bmi1, a stem cell factor, in cancer recurrence and chemore-  
485 sistance: preclinical and clinical evidences. *Stem Cells* 30: 372–378.
- 486 28. Sapiro R, Kostetskii I, Olds-Clarke P, Gerton GL, Radice GL, et al. (2002) Male infertility, impaired  
487 sperm motility, and hydrocephalus in mice deficient in sperm-associated antigen 6. *Molecular and*  
488 *cellular biology* 22: 6298–6305.
- 489 29. Eiberg H, Troelsen J, Nielsen M, Mikkelsen A, Mengel-From J, et al. (2008) Blue eye color in  
490 humans may be caused by a perfectly associated founder mutation in a regulatory element located  
491 within the herc2 gene inhibiting oca2 expression. *Human genetics* 123: 177–187.
- 492 30. Han J, Kraft P, Nan H, Guo Q, Chen C, et al. (2008) A genome-wide association study identifies  
493 novel alleles associated with hair color and skin pigmentation. *PLoS genetics* 4: e1000074.
- 494 31. Branicki W, Brudnik U, Wojas-Pelc A (2009) Interactions between herc2, oca2 and mclr may  
495 influence human pigmentation phenotype. *Annals of human genetics* 73: 160–170.
- 496 32. Mathieson I, Lazaridis I, Rohland N, Mallick S, Llamas B, et al. (2015) Eight thousand years of  
497 natural selection in europe. *bioRxiv* : 016477.

- 498 33. Pastural E, Ersoy F, Yalman N, Wulffraat N, Grillo E, et al. (2000) Two genes are responsible for  
499 griscelli syndrome at the same 15q21 locus. *Genomics* 63: 299–306.
- 500 34. Fukuda M, Kuroda T, Mikoshiba K (2002) Slac2-a/melanophilin, the missing link between rab27  
501 and myosin va: implications of a tripartite protein complex for melanosome transport. *The Journal*  
502 *of biological chemistry* 277: 12432.
- 503 35. Halaban R, Moellmann G (1990) Murine and human b locus pigmentation genes encode a gly-  
504 coprotein (gp75) with catalase activity. *Proceedings of the National Academy of Sciences* 87:  
505 4809–4813.
- 506 36. Sulem P, Gudbjartsson DF, Stacey SN, Helgason A, Rafnar T, et al. (2008) Two newly identified  
507 genetic determinants of pigmentation in europeans. *Nature genetics* 40: 835–837.
- 508 37. Voight BF, Kudaravalli S, Wen X, Pritchard JK (2006) A map of recent positive selection in the  
509 human genome. *PLoS biology* 4: e72.
- 510 38. Kenny EE, Timpson NJ, Sikora M, Yee MC, Moreno-Estrada A, et al. (2012) Melanesian blond  
511 hair is caused by an amino acid change in tyrp1. *Science* 336: 554–554.
- 512 39. Castellano S, Parra G, Sánchez-Quinto FA, Racimo F, Kuhlwilm M, et al. (2014) Patterns of coding  
513 variation in the complete exomes of three neandertals. *Proceedings of the National Academy of*  
514 *Sciences* 111: 6666–6671.
- 515 40. Pravtcheva DD, Wise TL (2001) Disruption of apc10/doc1 in three alleles of oligosyndactylism.  
516 *Genomics* 72: 78–87.
- 517 41. Kanehisa M, Goto S (2000) Kegg: kyoto encyclopedia of genes and genomes. *Nucleic acids research*  
518 28: 27–30.
- 519 42. Brawand D, Soumillon M, Necsulea A, Julien P, Csárdi G, et al. (2011) The evolution of gene  
520 expression levels in mammalian organs. *Nature* 478: 343–348.
- 521 43. Kircher M, Witten DM, Jain P, O’Roak BJ, Cooper GM, et al. (2014) A general framework for  
522 estimating the relative pathogenicity of human genetic variants. *Nature genetics* 46: 310–315.

- 523 44. Consortium EP, et al. (2012) An integrated encyclopedia of dna elements in the human genome.  
524 Nature 489: 57–74.
- 525 45. Rosenbloom KR, Dreszer TR, Long JC, Malladi VS, Sloan CA, et al. (2011) Encode whole-genome  
526 data in the ucsc genome browser: update 2012. Nucleic acids research : gkr1012.
- 527 46. Robinson PN, Köhler S, Bauer S, Seelow D, Horn D, et al. (2008) The human phenotype ontology:  
528 a tool for annotating and analyzing human hereditary disease. The American Journal of Human  
529 Genetics 83: 610–615.
- 530 47. Van Keuren M, Hart I, Kao FT, Neve R, Bruns G, et al. (1987) A somatic cell hybrid with a single  
531 human chromosome 22 corrects the defect in the cho mutant (ade-i) lacking adenylosuccinase  
532 activity. Cytogenetic and Genome Research 44: 142–147.
- 533 48. Gitiaux C, Ceballos-Picot I, Marie S, Valayannopoulos V, Rio M, et al. (2009) Misleading be-  
534 havioural phenotype with adenylosuccinate lyase deficiency. European Journal of Human Genetics  
535 17: 133–136.
- 536 49. Siepel A, Bejerano G, Pedersen JS, Hinrichs AS, Hou M, et al. (2005) Evolutionarily conserved  
537 elements in vertebrate, insect, worm, and yeast genomes. Genome research 15: 1034–1050.
- 538 50. Cooper GM, Goode DL, Ng SB, Sidow A, Bamshad MJ, et al. (2010) Single-nucleotide evolutionary  
539 constraint scores highlight disease-causing mutations. Nature methods 7: 250–251.
- 540 51. Kmoch S, Hartmannová H, Stibůrková B, Krijt J, Zikánová M, et al. (2000) Human adenylosucci-  
541 nate lyase (adsl), cloning and characterization of full-length cdna and its isoform, gene structure  
542 and molecular basis for adsl deficiency in six patients. Human molecular genetics 9: 1501–1513.
- 543 52. Maaswinkel-Mooij P, Laan L, Onkenhout W, Brouwer O, Jaeken J, et al. (1997) Adenylosuccinase  
544 deficiency presenting with epilepsy in early infancy. Journal of inherited metabolic disease 20:  
545 606–607.
- 546 53. Marie S, Cuppens H, Heuterspreute M, Jaspers M, Tola EZ, et al. (1999) Mutation analysis in  
547 adenylosuccinate lyase deficiency: Eight novel mutations in the re-evaluated full adsl coding se-  
548 quence. Human mutation 13: 197–202.

- 549 54. Race V, Marie S, Vincent MF, Van den Berghe G (2000) Clinical, biochemical and molecular  
550 genetic correlations in adenylosuccinate lyase deficiency. *Human molecular genetics* 9: 2159–2165.
- 551 55. Edery P, Chabrier S, Ceballos-Picot I, Marie S, Vincent MF, et al. (2003) Intrafamilial variability  
552 in the phenotypic expression of adenylosuccinate lyase deficiency: a report on three patients.  
553 *American Journal of Medical Genetics Part A* 120: 185–190.
- 554 56. Meister G, Landthaler M, Peters L, Chen PY, Urlaub H, et al. (2005) Identification of novel  
555 argonaute-associated proteins. *Current biology* 15: 2149–2155.
- 556 57. Du KL, Chen M, Li J, Lepore JJ, Mericko P, et al. (2004) Megakaryoblastic leukemia factor-1  
557 transduces cytoskeletal signals and induces smooth muscle cell differentiation from undifferentiated  
558 embryonic stem cells. *Journal of Biological Chemistry* 279: 17578–17586.
- 559 58. Mercher T, Busson-Le Coniat M, Monni R, Mauchauffé M, Khac FN, et al. (2001) Involvement of  
560 a human gene related to the drosophila spen gene in the recurrent t (1; 22) translocation of acute  
561 megakaryocytic leukemia. *Proceedings of the National Academy of Sciences* 98: 5776–5779.
- 562 59. Trahey M, Wong G, Halenbeck R, Rubinfeld B, Martin GA, et al. (1988) Molecular cloning of two  
563 types of gap complementary dna from human placenta. *Science* 242: 1697–1700.
- 564 60. Friedman E, Gejman PV, Martin GA, McCormick F (1993) Nonsense mutations in the c-terminal  
565 sh2 region of the gtpase activating protein (gap) gene in human tumours. *Nature genetics* 5:  
566 242–247.
- 567 61. Eerola I, Boon LM, Mulliken JB, Burrows PE, Domp Martin A, et al. (2003) Capillary  
568 malformation–arteriovenous malformation, a new clinical and genetic disorder caused by *rasa1*  
569 mutations. *The American Journal of Human Genetics* 73: 1240–1249.
- 570 62. Hershkovitz D, Bercovich D, Sprecher E, Lapidot M (2008) *Rasa1* mutations may cause hereditary  
571 capillary malformations without arteriovenous malformations. *British Journal of Dermatology* 158:  
572 1035–1040.
- 573 63. Whiting PJ, Bonnert TP, McKernan RM, Farrar S, Bourdelles BL, et al. (1999) Molecular and  
574 functional diversity of the expanding gaba-a receptor gene family. *Annals of the New York Academy*  
575 *of Sciences* 868: 645–653.

- 576 64. Edenberg HJ, Dick DM, Xuei X, Tian H, Almasy L, et al. (2004) Variations in *gabra2*, encoding  
577 the  $\alpha 2$  subunit of the gaba a receptor, are associated with alcohol dependence and with brain  
578 oscillations. *The American Journal of Human Genetics* 74: 705–714.
- 579 65. Knabl J, Witschi R, Hösl K, Reinold H, Zeilhofer UB, et al. (2008) Reversal of pathological pain  
580 through specific spinal gabaa receptor subtypes. *Nature* 451: 330–334.
- 581 66. Xiang YY, Wang S, Liu M, Hirota JA, Li J, et al. (2007) A gabaergic system in airway epithelium  
582 is essential for mucus overproduction in asthma. *Nature medicine* 13: 862–867.
- 583 67. Ma D, Whitehead P, Menold M, Martin E, Ashley-Koch A, et al. (2005) Identification of significant  
584 association and gene-gene interaction of gaba receptor subunit genes in autism. *The American*  
585 *Journal of Human Genetics* 77: 377–388.
- 586 68. Collins AL, Ma D, Whitehead PL, Martin ER, Wright HH, et al. (2006) Investigation of autism  
587 and gaba receptor subunit genes in multiple ethnic groups. *Neurogenetics* 7: 167–174.
- 588 69. Ariani F, Hayek G, Rondinella D, Artuso R, Mencarelli MA, et al. (2008) *Foxg1* is responsible for  
589 the congenital variant of rett syndrome. *The American Journal of Human Genetics* 83: 89–93.
- 590 70. Mencarelli M, Spanhol-Rosseto A, Artuso R, Rondinella D, De Filippis R, et al. (2010) Novel *foxg1*  
591 mutations associated with the congenital variant of rett syndrome. *Journal of medical genetics* 47:  
592 49–53.
- 593 71. Sadakata T, Furuichi T (2010) *Ca* 2+-dependent activator protein for secretion 2 and autistic-like  
594 phenotypes. *Neuroscience research* 67: 197–202.
- 595 72. Crisci JL, Wong A, Good JM, Jensen JD (2011) On characterizing adaptive events unique to  
596 modern humans. *Genome biology and evolution* 3: 791–798.
- 597 73. Guilherme A, Soriano NA, Furciniti PS, Czech MP (2004) Role of *ehd1* and *ehbp1* in perinuclear  
598 sorting and insulin-regulated *glut4* recycling in 3t3-l1 adipocytes. *Journal of Biological Chemistry*  
599 279: 40062–40075.
- 600 74. Gudmundsson J, Sulem P, Rafnar T, Bergthorsson JT, Manolescu A, et al. (2008) Common se-  
601 quence variants on 2p15 and xp11. 22 confer susceptibility to prostate cancer. *Nature genetics* 40:  
602 281–283.

- 603 75. Gong S, Zheng C, Doughty ML, Losos K, Didkovsky N, et al. (2003) A gene expression atlas of  
604 the central nervous system based on bacterial artificial chromosomes. *Nature* 425: 917–925.
- 605 76. Pennacchio LA, Ahituv N, Moses AM, Prabhakar S, Nobrega MA, et al. (2006) In vivo enhancer  
606 analysis of human conserved non-coding sequences. *Nature* 444: 499–502.
- 607 77. Li MJ, Wang P, Liu X, Lim EL, Wang Z, et al. (2011) Gwasdb: a database for human genetic  
608 variants identified by genome-wide association studies. *Nucleic acids research* : gkr1182.
- 609 78. Welter D, MacArthur J, Morales J, Burdett T, Hall P, et al. (2014) The nhgri gwas catalog, a  
610 curated resource of snp-trait associations. *Nucleic acids research* 42: D1001–D1006.
- 611 79. Paternoster L, Evans DM, Nohr EA, Holst C, Gaborieau V, et al. (2011) Genome-wide population-  
612 based association study of extremely overweight young adults–the goya study. *PLoS One* 6: e24303.
- 613 80. Suhre K, Wallaschofski H, Raffler J, Friedrich N, Haring R, et al. (2011) A genome-wide association  
614 study of metabolic traits in human urine. *Nature genetics* 43: 565–569.
- 615 81. Perlis RH, Huang J, Purcell S, Fava M, Rush AJ, et al. (2010) Genome-wide association study of  
616 suicide attempts in mood disorder patients. *Genome* 167.
- 617 82. Henrion M, Frampton M, Scelo G, Purdue M, Ye Y, et al. (2013) Common variation at 2q22. 3  
618 (zeb2) influences the risk of renal cancer. *Human molecular genetics* 22: 825–831.
- 619 83. Schlebusch CM, Skoglund P, Sjödin P, Gattepaille LM, Hernandez D, et al. (2012) Genomic varia-  
620 tion in seven khoe-san groups reveals adaptation and complex african history. *Science* 338: 374–379.
- 621 84. Sabeti PC, Reich DE, Higgins JM, Levine HZ, Richter DJ, et al. (2002) Detecting recent positive  
622 selection in the human genome from haplotype structure. *Nature* 419: 832–837.
- 623 85. Hernandez RD, Kelley JL, Elyashiv E, Melton SC, Auton A, et al. (2011) Classic selective sweeps  
624 were rare in recent human evolution. *science* 331: 920–924.
- 625 86. Ding Q, Hu Y, Xu S, Wang J, Jin L (2013) Neanderthal introgression at chromosome 3p21. 31 was  
626 under positive natural selection in east asians. *Molecular biology and evolution* : mst260.
- 627 87. Sankararaman S, Mallick S, Dannemann M, Prüfer K, Kelso J, et al. (2014) The genomic landscape  
628 of neanderthal ancestry in present-day humans. *Nature* 507: 354–357.



- 629 88. Pace L, Salvan A, Sartori N (2011) Adjusting composite likelihood ratio statistics. *Statistica Sinica*  
630 21: 129.
- 631 89. Fu Q, Li H, Moorjani P, Jay F, Slepchenko SM, et al. (2014) Genome sequence of a 45,000-year-old  
632 modern human from western siberia. *Nature* 514: 445–449.
- 633 90. Seguin-Orlando A, Korneliussen TS, Sikora M, Malaspinas AS, Manica A, et al. (2014) Genomic  
634 structure in europeans dating back at least 36,200 years. *Science* 346: 1113–1118.
- 635 91. Lazaridis I, Patterson N, Mitnik A, Renaud G, Mallick S, et al. (2014) Ancient human genomes  
636 suggest three ancestral populations for present-day europeans. *Nature* 513: 409–413.
- 637 92. Pickrell JK, Pritchard JK (2012) Inference of population splits and mixtures from genome-wide  
638 allele frequency data. *PLoS genetics* 8: e1002967.

## 639 Tables

**Table 1. Description of models tested.** All times are in generations. Selection in the "ancestral population" refers to a selective sweep where the beneficial mutation and fixation occurred before the split time of the two most closely related populations. Selection in "daughter population A" refers to a selective sweep that occurred in one of the two most closely related populations (A), after their split from each other.

| Model | Population where selection occurred | $t_{AB}$ | $t_{ABC}$ | $t_M$ | s   | $N_e$  |
|-------|-------------------------------------|----------|-----------|-------|-----|--------|
| A     | Ancestral population                | 500      | 2,000     | 1,800 | 0.1 | 10,000 |
| B     | Ancestral population                | 1,000    | 4,000     | 2,500 | 0.1 | 10,000 |
| C     | Ancestral population                | 2,000    | 4,000     | 3,500 | 0.1 | 10,000 |
| D     | Ancestral population                | 3,000    | 8,000     | 5,000 | 0.1 | 10,000 |
| E     | Ancestral population                | 2,000    | 16,000    | 8,000 | 0.1 | 10,000 |
| F     | Ancestral population                | 4,000    | 16,000    | 8,000 | 0.1 | 10,000 |
| I     | Daughter population A               | 2,000    | 4,000     | 1,000 | 0.1 | 10,000 |
| J     | Daughter population A               | 3,000    | 8,000     | 2,000 | 0.1 | 10,000 |

**Table 2. Top hits for 3P-CLR run on the European terminal branch, using Africans as the outgroup.** We show the windows in the top 99.9% quantile of scores. Windows were merged together if they were contiguous. Win max = Location of window with maximum score. Win start = left-most end of left-most window for each region. Win end = right-most end of right-most window for each region. All positions were rounded to the nearest 100 bp. Score max = maximum score within region.

| chr | Win max   | Win start | Win end   | Score max | Genes within region                                                                                                                                                               |
|-----|-----------|-----------|-----------|-----------|-----------------------------------------------------------------------------------------------------------------------------------------------------------------------------------|
| 17  | 19175100  | 18858600  | 19445800  | 173.751   | SLC5A10,FAM83G,GRAP,GRAPL,EPN2,B9D1,MAPK7,MFAP4,RNF112,SLC47A1,DDIT4,DNAJB12,MICU1,MCU,OIT3,PLA2G12B,P4HA1,NUDT13,ECD,FAM149B1,DNAJC9,MRPS16,TTC18,ANXA7,MSS51,PPP3CB,USP54,MYOZ1 |
| 10  | 74736500  | 74007800  | 75402200  | 161.092   | APBA2                                                                                                                                                                             |
| 15  | 29241200  | 29210600  | 29338200  | 155.873   | BRAP,ACAD10,ALDH2,MAPKAPK5,TMEM116,ERP29,NAA25,TRAFD1,RPL6,PTPN11,RPH3A,CUX2,FAM109A,SH2B3,ATXN2                                                                                  |
| 12  | 113010000 | 111691000 | 113030000 | 145.07    | DLGAP3,ZMYM6NB,ZMYM6,ZMYM1,SFPQ,ZMYM4,KIAA0319L,NCDN,TFAP2E,PSMB2,C1orf216,CLSPN,AGO4,AGO1,AGO3,TEKT2,ADPRHL2,COL8A2                                                              |
| 1   | 35623900  | 35380800  | 36584500  | 140.484   | GPHN,FAM71D,MPP5,ATP6V1D,EIF2S1,PLEK2,TMEM229B                                                                                                                                    |
| 14  | 66765100  | 66471400  | 67923400  | 125.356   | RASGRP2,PYGM,SF1,MAP4K2,MEN1,SLC22A11,SLC22A12,NRXN2                                                                                                                              |
| 11  | 64581000  | 64217100  | 64588600  | 122.885   | INOSB,WBP1,MOGS,MRPL53,CCDC142,TTC31,LBX2,PCGF1,TLX2,DQX1,AUP1,HTRA2,LOXL3,DOK1,M1AP,SEMA4F,BOLA3,MOB1A,MTHFD2,SLC4A5,DCTN1,WDR54,RTKN                                            |
| 2   | 74507400  | 74365200  | 74970500  | 118.922   | THSD4,MYO9A,SENPA8,GRAMD2,PKM,PARP6,CELF6,HEXA,TMEM202,ARIH1,GOLGA6B,BBS4,ADPGK                                                                                                   |
| 15  | 72654000  | 72057800  | 73108700  | 115.575   | ZSCAN25,CYP3A5,CYP3A7,CYP3A4,SMURF1,KPNA7,ARPC1A,ARPC1B,PDAP1,BUD31,PTCD1,ATP5J2-PTCD1,CPSF4,ATP5J2,ZNF789,ZNF394,ZKSCAN5,FAM200A,ZNF655                                          |
| 7   | 98882800  | 98717700  | 99369400  | 114.032   | C15orf43,SORD,DUOX2,DUOXA2,DUOXA1,DUOX1                                                                                                                                           |
| 15  | 45332100  | 45094600  | 45436600  | 109.189   | -                                                                                                                                                                                 |
| 7   | 81142700  | 81087600  | 81298600  | 107.683   | ZEB1                                                                                                                                                                              |
| 10  | 31863100  | 31479100  | 31908500  | 105.903   | CCDC102B                                                                                                                                                                          |
| 18  | 66807000  | 66646700  | 66883000  | 104.605   | NRG3                                                                                                                                                                              |
| 10  | 83601100  | 83597800  | 83761400  | 103.49    | -                                                                                                                                                                                 |
| 4   | 167411000 | 167094000 | 167644000 | 102.882   | DPH6                                                                                                                                                                              |
| 15  | 35551700  | 35444900  | 35727400  | 102.53    | -                                                                                                                                                                                 |
| 4   | 60872200  | 60814500  | 61356600  | 101.779   | IYD                                                                                                                                                                               |
| 6   | 150686000 | 150637000 | 150738000 | 100.616   | FGF1,ARHGAP26                                                                                                                                                                     |
| 5   | 142116000 | 142074000 | 142194000 | 99.5731   | NFASC                                                                                                                                                                             |
| 1   | 204823000 | 204680000 | 204872000 | 94.6291   | TAL2,TMEM38B                                                                                                                                                                      |
| 9   | 108572000 | 108412000 | 108755000 | 92.1087   | -                                                                                                                                                                                 |
| 2   | 104933000 | 104749000 | 105027000 | 91.4296   | SPIN1,NXNL2                                                                                                                                                                       |
| 9   | 91155000  | 90913100  | 91201600  | 89.9796   | TYRP1,LURAP1L                                                                                                                                                                     |
| 9   | 12777200  | 12488900  | 12787600  | 89.8212   | MYO5C,MYO5A,ARPP19,FAM214A                                                                                                                                                        |
| 15  | 52859500  | 52581800  | 52992200  | 88.5241   | HEATR6,CA4,USP32,C17orf64,APPBP2,PPM1D,BCAS3                                                                                                                                      |
| 17  | 58512800  | 58075800  | 59174400  | 88.2992   | MOGAT2,DGAT2,UVRAG                                                                                                                                                                |
| 11  | 75850500  | 75434700  | 75868100  | 87.6352   | -                                                                                                                                                                                 |
| 21  | 21424100  | 21378700  | 21643900  | 87.5231   | -                                                                                                                                                                                 |
| 18  | 7330950   | 7259810   | 7374120   | 84.6369   | IMPG1                                                                                                                                                                             |
| 6   | 76751700  | 76636000  | 77261200  | 84.398    | ADRBK2                                                                                                                                                                            |
| 22  | 25939100  | 25932200  | 26133300  | 84.3301   | -                                                                                                                                                                                 |
| 15  | 48211200  | 48153900  | 48308500  | 83.8987   | XRCC4,VCAN                                                                                                                                                                        |
| 5   | 82679100  | 82488400  | 82790300  | 83.6618   | TBC1D32,GJA1                                                                                                                                                                      |
| 6   | 121627000 | 121082000 | 121788000 | 83.5179   | -                                                                                                                                                                                 |
| 20  | 53878400  | 53876100  | 54051800  | 82.7889   | NOS1AP                                                                                                                                                                            |
| 1   | 162116000 | 162002000 | 162228000 | 81.759    | PSD3                                                                                                                                                                              |
| 8   | 18519100  | 18514800  | 18647300  | 81.1436   | EPHA6                                                                                                                                                                             |
| 3   | 97346000  | 96453200  | 97364600  | 80.9285   | DLK2,TJAP1,LRRRC73,POLR1C,YIPF3,XPO5,POLH,GTPBP2,MAD2L1BP,RSPH9,MRPS18A                                                                                                           |
| 6   | 43624100  | 43419100  | 43688500  | 80.7957   | ITGA4,CERKL,NEUROD1,SSFA2,PPP1R1C                                                                                                                                                 |
| 2   | 182591000 | 182360000 | 182839000 | 80.6618   | MAGI2                                                                                                                                                                             |
| 7   | 78745700  | 78688500  | 78982700  | 80.4923   | PPP1R12A                                                                                                                                                                          |
| 12  | 80298900  | 80117100  | 80435100  | 80.4656   | DGKI                                                                                                                                                                              |
| 7   | 137213000 | 137120000 | 137360000 | 79.5913   | -                                                                                                                                                                                 |
| 2   | 216600000 | 216551000 | 216628000 | 79.4415   | SYNPO,MYOZ3,RBM22,DCTN4,SMIM3,IRGM,ZNF300                                                                                                                                         |
| 5   | 150045000 | 149992000 | 150386000 | 79.1225   | -                                                                                                                                                                                 |
| 9   | 87890100  | 87820300  | 88099100  | 78.98     | C14orf28,KLHL28,FAM179B,PRPF39,FKBP3,FANCM,MIS18BP1                                                                                                                               |
| 14  | 45251400  | 45194500  | 45849200  | 78.664    | KIAA1244,PBOV1                                                                                                                                                                    |
| 6   | 138591000 | 138479000 | 138645000 | 78.5803   | PRDM10,APLP2,ST14                                                                                                                                                                 |
| 11  | 129910000 | 129805000 | 130073000 | 78.4337   | HECTD2                                                                                                                                                                            |
| 10  | 93143500  | 93060300  | 93325000  | 78.2142   | KCNK3                                                                                                                                                                             |
| 2   | 18352000  | 18284800  | 18517900  | 77.8332   | -                                                                                                                                                                                 |
| 2   | 194863000 | 194678000 | 196286000 | 77.7683   | IQCJ-SCHIP1                                                                                                                                                                       |
| 3   | 159281000 | 159244000 | 159477000 | 76.9608   | ITM2B,RB1,LPAR6,RCBTB2,CYSLTR2                                                                                                                                                    |
| 13  | 48977600  | 48726500  | 49291500  | 76.6641   |                                                                                                                                                                                   |

**Table 3. Top hits for 3P-CLR run on the East Asian terminal branch, using Africans as the outgroup.** We show the windows in the top 99.9% quantile of scores. Windows were merged together if they were contiguous. Win max = Location of window with maximum score. Win start = left-most end of left-most window for each region. Win end = right-most end of right-most window for each region. All positions were rounded to the nearest 100 bp. Score max = maximum score within region.

| chr | Win max   | Win start | Win end   | Score max | Genes within region                                                                                                                                                                                                                                                                                                                                                                                                                                                                                                                                          |
|-----|-----------|-----------|-----------|-----------|--------------------------------------------------------------------------------------------------------------------------------------------------------------------------------------------------------------------------------------------------------------------------------------------------------------------------------------------------------------------------------------------------------------------------------------------------------------------------------------------------------------------------------------------------------------|
| 5   | 117510000 | 117345000 | 117716000 | 249.186   | -                                                                                                                                                                                                                                                                                                                                                                                                                                                                                                                                                            |
| 3   | 58238900  | 58104900  | 58557500  | 221.826   | FLNB, DNASE1L3, ABHD6, RPP14, PXX, PDHB, KCTD6, ACOX2, FAM107A                                                                                                                                                                                                                                                                                                                                                                                                                                                                                               |
| 10  | 94874300  | 94840100  | 95720400  | 211.168   | MYOF, CEP55, FFAR4, RBP4, PDE6C, FRA10AC1, LGI1, SLC35G1                                                                                                                                                                                                                                                                                                                                                                                                                                                                                                     |
| 2   | 72378700  | 72353700  | 73177300  | 210.631   | CYP26B1, EXOC6B, SPR, EMX1, SFXN5                                                                                                                                                                                                                                                                                                                                                                                                                                                                                                                            |
| 15  | 64166100  | 63692600  | 64339800  | 209.852   | USP3, FBXL22, HERC1, DAPK2                                                                                                                                                                                                                                                                                                                                                                                                                                                                                                                                   |
| 4   | 42193900  | 41824100  | 42206800  | 207.344   | TMEM33, DCAF4L1, SLC30A9, BEND4                                                                                                                                                                                                                                                                                                                                                                                                                                                                                                                              |
| 11  | 25172400  | 25098500  | 25276200  | 200.866   | LUZP2                                                                                                                                                                                                                                                                                                                                                                                                                                                                                                                                                        |
| 1   | 234347000 | 234207000 | 234380000 | 180.97    | SLC35F3                                                                                                                                                                                                                                                                                                                                                                                                                                                                                                                                                      |
| 4   | 158638000 | 158481000 | 158740000 | 175.394   | -                                                                                                                                                                                                                                                                                                                                                                                                                                                                                                                                                            |
| 17  | 61536300  | 60912100  | 61549600  | 168.02    | TANC2, CYB561                                                                                                                                                                                                                                                                                                                                                                                                                                                                                                                                                |
| 20  | 24793800  | 24570100  | 25037800  | 164.012   | SYNDIG1, CST7, APMAP, ACSS1                                                                                                                                                                                                                                                                                                                                                                                                                                                                                                                                  |
| 4   | 86504400  | 86438300  | 86602900  | 160.869   | ARHGAP24                                                                                                                                                                                                                                                                                                                                                                                                                                                                                                                                                     |
| 10  | 56026900  | 55868800  | 56209000  | 157.583   | PCDH15                                                                                                                                                                                                                                                                                                                                                                                                                                                                                                                                                       |
| 1   | 75622900  | 75277800  | 76729300  | 155.376   | LHX8, SLC44A5, ACADM, RABGGTB, MSH4, ASB17, ST6GALNAC3                                                                                                                                                                                                                                                                                                                                                                                                                                                                                                       |
| 7   | 112265000 | 112125000 | 112622000 | 147.988   | LSMEM1, TMEM168, C7orf60                                                                                                                                                                                                                                                                                                                                                                                                                                                                                                                                     |
| 18  | 5299800   | 5203000   | 5314080   | 147.972   | ZBTB14                                                                                                                                                                                                                                                                                                                                                                                                                                                                                                                                                       |
| 4   | 135424000 | 134792000 | 135547000 | 146.919   | -                                                                                                                                                                                                                                                                                                                                                                                                                                                                                                                                                            |
| 7   | 1.09E+08  | 108741000 | 109226000 | 145.365   | -                                                                                                                                                                                                                                                                                                                                                                                                                                                                                                                                                            |
| 1   | 172931000 | 172670000 | 172950000 | 143.351   | -                                                                                                                                                                                                                                                                                                                                                                                                                                                                                                                                                            |
| 22  | 46760700  | 46594600  | 46831200  | 141.902   | PPARA, CDPF1, PKDREJ, TTC38, GTSE1, TRMU, CELSR1                                                                                                                                                                                                                                                                                                                                                                                                                                                                                                             |
| 10  | 53363100  | 53226200  | 53440300  | 140.25    | PRKG1                                                                                                                                                                                                                                                                                                                                                                                                                                                                                                                                                        |
| 8   | 10836400  | 10467500  | 11126200  | 137.393   | RP1L1, C8orf74, SOX7, PINX1, XKR6                                                                                                                                                                                                                                                                                                                                                                                                                                                                                                                            |
| 3   | 102005000 | 101902000 | 102242000 | 135.116   | ZPLD1                                                                                                                                                                                                                                                                                                                                                                                                                                                                                                                                                        |
| 6   | 69974500  | 69524500  | 70359500  | 134.756   | BAI3                                                                                                                                                                                                                                                                                                                                                                                                                                                                                                                                                         |
| 2   | 26159900  | 25853900  | 26233500  | 133.01    | KIF3C, DTNB                                                                                                                                                                                                                                                                                                                                                                                                                                                                                                                                                  |
| 18  | 67572500  | 67533400  | 67877100  | 132.023   | CD226, RTTN                                                                                                                                                                                                                                                                                                                                                                                                                                                                                                                                                  |
| 3   | 104826000 | 104604000 | 104910000 | 130.642   | -                                                                                                                                                                                                                                                                                                                                                                                                                                                                                                                                                            |
| 2   | 17456900  | 17247000  | 17564600  | 126.069   | -                                                                                                                                                                                                                                                                                                                                                                                                                                                                                                                                                            |
| 12  | 93322200  | 92983200  | 93454700  | 125.576   | C12orf74, PLEKHG7, EEA1                                                                                                                                                                                                                                                                                                                                                                                                                                                                                                                                      |
| 20  | 31604100  | 31304800  | 31614200  | 125.536   | COMMD7, DNMT3B, MAPRE1, SUN5, BPIFB2                                                                                                                                                                                                                                                                                                                                                                                                                                                                                                                         |
| 2   | 56096500  | 55929400  | 56198400  | 124.835   | EFEMP1                                                                                                                                                                                                                                                                                                                                                                                                                                                                                                                                                       |
| 9   | 107052000 | 106657000 | 107058000 | 124.094   | SMC2                                                                                                                                                                                                                                                                                                                                                                                                                                                                                                                                                         |
| 13  | 63542000  | 63261200  | 63971200  | 124.033   | -                                                                                                                                                                                                                                                                                                                                                                                                                                                                                                                                                            |
| 4   | 80074800  | 79878800  | 80250300  | 122.138   | NAA11                                                                                                                                                                                                                                                                                                                                                                                                                                                                                                                                                        |
| 2   | 109534000 | 108937000 | 109626000 | 121.83    | LIMS1, RANBP2, CCDC138, EDAR, SULT1C4, GCC2                                                                                                                                                                                                                                                                                                                                                                                                                                                                                                                  |
| 12  | 124021000 | 123925000 | 124275000 | 121.45    | SNRNP35, RILPL1, TMED2, DDX55, EIF2B1, GTF2H3, TCTN2, ATP6V0A2, DNAH10                                                                                                                                                                                                                                                                                                                                                                                                                                                                                       |
| 5   | 119814000 | 119666000 | 119870000 | 119.87    | PRR16                                                                                                                                                                                                                                                                                                                                                                                                                                                                                                                                                        |
| 16  | 67607200  | 66947800  | 68430200  | 119.175   | ACD, PAR6A, ENKD1, C16orf86, GFOD2, RANBP10, TSNAXIP1, CENPT, THAP11, NUTF2, EDC4, NRN1L, PSKH1, CTRL, PSMB10, LCAT, SLC12A4, DPEP3, DPEP2, DUS2, DDX28, NFATC3, ESRP2, PLA2G15, SLC7A6, SLC7A6OS, PRMT7, SMPD3, CDH16, RRAD, FAM96B, CES2, CES3, CES4A, CBFB, C16orf70, B3GNT9, TRADD, FBXL8, HSF4, NOL3, KIAA0895L, EXOC3L1, E2F4, ELMO3, LRRC29, TMEM208, FHOD1, SLC9A5, PLEKHG4, KCTD19, LRRC36, TPPP3, ZDHHC1, HSD11B2, ATP6V0D1, AGRF, FAM65A, CTCF, RLTPR                                                                                             |
| 10  | 97039700  | 96682100  | 97059000  | 118.353   | CYP2C9, CYP2C8, C10orf129, PDLIM1                                                                                                                                                                                                                                                                                                                                                                                                                                                                                                                            |
| 3   | 17197100  | 17188900  | 17897600  | 117.877   | TBC1D5                                                                                                                                                                                                                                                                                                                                                                                                                                                                                                                                                       |
| 4   | 28858500  | 28537900  | 28879000  | 116.991   | -                                                                                                                                                                                                                                                                                                                                                                                                                                                                                                                                                            |
| 12  | 55254800  | 55126200  | 55322100  | 113.527   | MUCL1                                                                                                                                                                                                                                                                                                                                                                                                                                                                                                                                                        |
| 12  | 103350000 | 103178000 | 103439000 | 112.494   | PAH, ASCL1                                                                                                                                                                                                                                                                                                                                                                                                                                                                                                                                                   |
| 5   | 10480500  | 10311500  | 10491100  | 110.472   | MARCH6, ROPN1L                                                                                                                                                                                                                                                                                                                                                                                                                                                                                                                                               |
| 5   | 153541000 | 153053000 | 153736000 | 110.3     | GRIA1, FAM114A2, MFAP3, GALNT10                                                                                                                                                                                                                                                                                                                                                                                                                                                                                                                              |
| 3   | 37465800  | 36837400  | 37518800  | 109.917   | TRANK1, EPM2AIP1, MLH1, LRRFIP2, GOLGA4, C3orf35, ITGA9                                                                                                                                                                                                                                                                                                                                                                                                                                                                                                      |
| 3   | 49165200  | 48396900  | 50415600  | 109.512   | RBMS5, SEMA3F, GNAT1, GNAI2, LSMEM2, IFRD2, HYAL3, NAT6, HYAL1, HYAL2, TUSC2, RASSF1, ZMYND10, NPRL2, CYB561D2, TMEM115, CACNA2D2, FBXW12, PLXNB1, CCDC51, TMA7, ATRIP, TREX1, SHISA5, PFKFB4, UCN2, COL7A1, UQCRC1, TMEM89, SLC26A6, CELSR3, NCKIF3, IP6K2, PRKAR2A, SLC25A20, ARIH2OS, ARIH2, P4HTM, WDR6, DALRD3, NDUFAF3, IMPDH2, QRICH1, QARS, USP19, LAMB2, CCDC71, KLHDC8B, C3orf84, CCDC36, C3orf62, USP4, GPX1, RHOA, TCTA, AMT, NICN1, DAG1, BSN, APEH, MST1, RNFI23, AMIGO3, GMPFB, IP6K1, CDHR4, FAM212A, UBA7, TRAIP, CAMKV, MST1R, MON1A, RBM6 |
| 17  | 48390900  | 48365600  | 48608400  | 109.226   | XYLT2, MRPL27, EME1, LRRC59, ACSF2, CHAD, RSAD1, MYCBPAP                                                                                                                                                                                                                                                                                                                                                                                                                                                                                                     |

**Table 4. Top hits for 3P-CLR run on the Eurasian ancestral branch, using Africans as the outgroup.** We show the windows in the top 99.9% quantile of scores. Windows were merged together if they were contiguous. Win max = Location of window with maximum score. Win start = left-most end of left-most window for each region. Win end = right-most end of right-most window for each region. All positions were rounded to the nearest 100 bp. Score max = maximum score within region.

| chr | Win max   | Win start | Win end   | Score max | Genes within region                                                                                                                      |
|-----|-----------|-----------|-----------|-----------|------------------------------------------------------------------------------------------------------------------------------------------|
| 17  | 58658700  | 58117400  | 59309500  | 541.05    | HEATR6,CA4,USP32,C17orf64,APBP2,PPM1D,BCAS3                                                                                              |
| 10  | 22705100  | 22428900  | 22798800  | 535.104   | EBLN1,COMMD3,COMMD3-BMI1,BMI1,SPAG6                                                                                                      |
| 17  | 62870600  | 62655400  | 63068200  | 511.926   | SMURF2,LRRC37A3,GNA13                                                                                                                    |
| 18  | 67572500  | 67533400  | 67881500  | 477.032   | CD226,RTTN                                                                                                                               |
| 2   | 22420000  | 22187700  | 22469200  | 461.001   | -                                                                                                                                        |
| 1   | 230018000 | 229910000 | 230132000 | 444.349   | -                                                                                                                                        |
| 7   | 99227800  | 98717700  | 99374100  | 435.299   | ZSCAN25,CYP3A5,CYP3A7,CYP3A4,SMURF1,KPNA7,ARPC1A,ARPC1B,PDAP1,BUD31,PTCD1,ATP5J2-PTCD1,CPSF4,ATP5J2,ZNF789,ZNF394,ZKSCAN5,FAM200A,ZNF655 |
| 20  | 54054100  | 53877600  | 54056600  | 425.515   | -                                                                                                                                        |
| 4   | 41834200  | 41823000  | 42195900  | 421.548   | TMEM33,DCAF4L1,SLC30A9,BEND4                                                                                                             |
| 17  | 61536300  | 60942800  | 61549600  | 406.862   | TANC2,CYB561                                                                                                                             |
| 1   | 25592800  | 25517600  | 25869600  | 404.258   | SYF2,C1orf63,RHD,TMEM50A,RHCE,TMEM57                                                                                                     |
| 10  | 93143500  | 93060300  | 93325000  | 398.359   | HECTD2                                                                                                                                   |
| 9   | 90946300  | 90908100  | 91200000  | 397.639   | SPIN1,NXNL2                                                                                                                              |
| 3   | 97346000  | 96453200  | 97364600  | 395.762   | EPHA6                                                                                                                                    |
| 6   | 3149410   | 3073260   | 3204820   | 395.04    | RIPK1,BPHL,TUBB2A                                                                                                                        |
| 6   | 10644100  | 10578900  | 10784300  | 389.704   | GCNT2,C6orf52,PAK1IP1,TMEM14C,TMEM14B,SYCP2L,MAK                                                                                         |
| 5   | 121498000 | 121486000 | 121640000 | 385.618   | ZNF474                                                                                                                                   |
| 10  | 31863100  | 31479100  | 31908500  | 383.622   | ZEB1                                                                                                                                     |
| 1   | 64483200  | 64340800  | 64538400  | 381.831   | ROR1                                                                                                                                     |
| 10  | 66018600  | 65795200  | 66311900  | 380.584   | -                                                                                                                                        |
| 4   | 13424000  | 13143500  | 13535500  | 378.487   | RAB28                                                                                                                                    |
| 15  | 65012200  | 64308500  | 65208800  | 376.663   | DAPK2,FAM96A,SNX1,SNX22,PPIB,CSNK1G1,KIAA0101,TRIP4,ZNF609,OAZ2,RBPM2,PIF1,PLEKHO2,ANKDD1A                                               |
| 4   | 33576600  | 33301000  | 33643000  | 373.953   | -                                                                                                                                        |
| 3   | 188751000 | 188647000 | 188859000 | 371.551   | TPRG1                                                                                                                                    |
| 4   | 177625000 | 177608000 | 177889000 | 370.287   | VEGFC                                                                                                                                    |
| 16  | 61316300  | 61123100  | 61456600  | 369.203   | -                                                                                                                                        |
| 2   | 73545700  | 73488400  | 74117400  | 368.52    | FBXO41,EGR4,ALMS1,NAT8,TPRKB,DUSP11,C2orf78,STAMBP                                                                                       |
| 13  | 49170200  | 48726500  | 49293400  | 366.868   | ITM2B,RB1,LPAR6,RCBTB2,CYSLTR2                                                                                                           |
| 11  | 19609000  | 19591300  | 19731200  | 366.495   | NAV2                                                                                                                                     |
| 12  | 111447000 | 111331000 | 111655000 | 365.613   | CCDC63,MYL2,CUX2                                                                                                                         |
| 7   | 142800000 | 142639000 | 143022000 | 364.893   | OR9A2,OR6V1,PIP,TAS2R39,TAS2R40,GSTK1,TMEM139,CASP2,CLCN1,KEL                                                                            |
| 16  | 47937600  | 33585200  | 48471700  | 362.804   | SHCBP1,VPS35,ORC6,MYLK3,C16orf87,GPT2,DNAJA2,NETO2,ITFG1,PHKB,ABCC12,ABCC11,LONP2,SLAH1                                                  |
| 20  | 35293200  | 35003300  | 35596300  | 362.528   | DLGAP4,MYL9,TGIF2,TGIF2-C20orf24,C20orf24,SLA2,NDRG3,DSN1,SOGA1,TLDC2,SAMHD1                                                             |
| 7   | 30270500  | 30178800  | 30471600  | 361.081   | MTURN,ZNRF2,NOD1                                                                                                                         |
| 15  | 28362400  | 28295700  | 28630200  | 360.613   | OCA2,HERC2                                                                                                                               |
| 8   | 30625000  | 30515900  | 30891400  | 360.176   | GSR,PPP2CB,TEX15,PURG,WRN                                                                                                                |
| 5   | 159211000 | 159139000 | 159271000 | 359.48    | -                                                                                                                                        |
| 14  | 90449500  | 90301800  | 90531400  | 359.187   | EFCAB11,TDP1,KCNK13                                                                                                                      |
| 11  | 39699100  | 39604100  | 39937900  | 357.303   | -                                                                                                                                        |
| 5   | 11741300  | 11640500  | 11850200  | 356.6     | CTNND2                                                                                                                                   |
| 17  | 27227600  | 26844500  | 27341600  | 354.11    | RPL23A,TLCD1,NEK8,TRAF4,FAM222B,ERAL1,FLOT2,DHRS13,PHF12,FOXN1,UNC119,PIPOX,PIGS,ALDOC,SEZ6,SPAG5,KIAA0100,SDF2,SUPT6H,PROCA1,RAB34      |

**Table 5. Top hits for 3P-CLR run on the ancestral branch to Eurasians and Africans, using archaic humans as the outgroup.** We show the windows in the top 99.9% quantile of scores. Windows were merged together if they were contiguous. Win max = Location of window with maximum score. Win start = left-most end of left-most window for each region. Win end = right-most end of right-most window for each region. All positions were rounded to the nearest 100 bp. Score max = maximum score within region.

| chr | Win max   | Win start | Win end   | Score max | Genes within region                                                                                                                                                                                                                       |
|-----|-----------|-----------|-----------|-----------|-------------------------------------------------------------------------------------------------------------------------------------------------------------------------------------------------------------------------------------------|
| 21  | 34916200  | 34737300  | 35222100  | 852.869   | IFNGR2, TMEM50B, DNAJC28, GART, SON, DONSON, CRYZL1, ITSN1                                                                                                                                                                                |
| 17  | 526595700 | 56373200  | 57404800  | 832.783   | BZRAP1, SUPT4H1, RNF43, HSF5, MTMR4, SEPT4, C17orf47, TEX14, RAD51C, PPM1E, TRIM37, SKA2, PRR11, SMG8, GDDP1                                                                                                                              |
| 12  | 79919700  | 79756800  | 80109400  | 827.892   | SYT1, PAWR                                                                                                                                                                                                                                |
| 14  | 29635300  | 29222200  | 29696100  | 823.504   | FOXG1                                                                                                                                                                                                                                     |
| 14  | 71790600  | 71658900  | 72283600  | 822.057   | SIPA1L1                                                                                                                                                                                                                                   |
| 12  | 116589000 | 116366000 | 116760000 | 814.828   | MED13L                                                                                                                                                                                                                                    |
| 2   | 37989300  | 37917400  | 38021500  | 813.181   | CDC42EP3                                                                                                                                                                                                                                  |
| 3   | 36941700  | 36836900  | 37517500  | 805.571   | TRANK1, EPM2AIP1, MLH1, LRRFIP2, GOLGA4, C3orf35, ITGA9                                                                                                                                                                                   |
| 4   | 146155000 | 145355000 | 146222000 | 803.332   | HHIP, ANAPC10, ABCE1, OTUD4                                                                                                                                                                                                               |
| 5   | 86911000  | 86463700  | 87101400  | 802.795   | RASA1, CCNH                                                                                                                                                                                                                               |
| 2   | 156468000 | 155639000 | 156767000 | 800.114   | KCNJ3                                                                                                                                                                                                                                     |
| 1   | 213498000 | 213145000 | 213561000 | 798.967   | VASH2, ANGEL2, RPS6KC1                                                                                                                                                                                                                    |
| 7   | 107229000 | 106619000 | 107308000 | 787.005   | PRKAR2B, HBP1, COG5, GPR22, DUS4L, BCAP29, SLC26A4                                                                                                                                                                                        |
| 17  | 61237300  | 60906000  | 61544500  | 784.538   | TANC2, CYB561                                                                                                                                                                                                                             |
| 7   | 121700000 | 121620000 | 122369000 | 784.297   | PTPRZ1, AASS, FEZF1, CADPS2, RNF133, RNF148                                                                                                                                                                                               |
| 21  | 36769600  | 36689700  | 36842100  | 775.26    | RUNX1                                                                                                                                                                                                                                     |
| 5   | 93214400  | 92677500  | 93645500  | 773.258   | NR2F1, FAM172A, POU5F2, KIAA0825                                                                                                                                                                                                          |
| 15  | 49269100  | 49247500  | 50036600  | 771.33    | SECISBP2L, COPS2, GALK2, FAM227B, FGF7, DTWD1, SHC4                                                                                                                                                                                       |
| 13  | 96782600  | 96180700  | 97420500  | 767.375   | CLDN10, DZIP1, DNAJC3, UGGT2, HS6ST3                                                                                                                                                                                                      |
| 4   | 13346700  | 13140300  | 13533100  | 762.438   | RAB28                                                                                                                                                                                                                                     |
| 1   | 176411000 | 175890000 | 176437000 | 762.017   | RFWD2, PAPPA2                                                                                                                                                                                                                             |
| 3   | 50576000  | 50177100  | 51929300  | 760.176   | SEMA3F, GNAT1, GNAI2, LSMEM2, IFRD2, HYAL3, NAT6, HYAL1, HYAL2, TUSC2, RASSF1, ZMYND10, NPRL2, CYB561D2, TMEM115, CACNA2D2, C3orf18, HEMK1, CISH, MAPKAPK3, DOCK3, MANF, RBM15B, RAD54L2, TEX264, GRM2, IQCF6, IQCF3, IQCF2, IQCF5, IQCF1 |
| 9   | 125562000 | 125505000 | 126059000 | 755.867   | ZBTB26, RABGAP1, GPR21, STRBP, OR1L6, OR5C1, PDCL, OR1K1, RC3H2, ZBTB6                                                                                                                                                                    |
| 7   | 99167000  | 98722100  | 99375300  | 754.442   | CYP3A5, ZSCAN25, CYP3A7, CYP3A4, SMURF1, KPNA7, ARPC1A, ARPC1B, PDAP1, BUD31, PTC1D1, ATP5J2                                                                                                                                              |
| 4   | 46634200  | 46361400  | 47004100  | 753.008   | PTCD1, CPSF4, ATP5J2, ZNF789, ZNF394, ZKSCAN5, FAM200A, ZNF655                                                                                                                                                                            |
| 22  | 40521100  | 40350900  | 41080200  | 750.394   | GABRA2, COX7B2, GABRA4, GABRB1                                                                                                                                                                                                            |
| 13  | 44935700  | 44887400  | 45237200  | 750.165   | GRAP2, FAM83F, TNRC6B, ADSL, SGSM3, MKL1, MCHR1                                                                                                                                                                                           |
| 2   | 73506800  | 73482800  | 74054300  | 747.479   | SERP2, TSC22D1                                                                                                                                                                                                                            |
| 5   | 89579400  | 89008500  | 89654700  | 746.591   | FBXO41, EGR4, ALMS1, NAT8, TPRKB, DUSP11, C2orf78                                                                                                                                                                                         |
| 19  | 19313800  | 19100800  | 19788800  | 746.184   | SUGP2, ARMC6, SLC25A42, TMEM161A, MEF2BNB, MEF2B, MEF2B, MEF2BNB, RFXANK, NR2C2AP, NCAN, HAPLN4, TM6SF2, SUGP1, MAU2, GATAD2A, TSSK6, NDUFAL3, YJEFN3, CILP2, PBX4, LPAR2, GMIP, ATP13A1, ZNF101                                          |
| 3   | 110709000 | 110513000 | 110932000 | 746.168   | PVRL3                                                                                                                                                                                                                                     |
| 10  | 119809000 | 119698000 | 119995000 | 745.865   | RAB11FIP2                                                                                                                                                                                                                                 |
| 2   | 63889800  | 62767900  | 64394800  | 745.126   | EHBP1, OTX1, WDPCP, MDH1, UGP2, VPS54, PELI1                                                                                                                                                                                              |
| 5   | 50148300  | 44575900  | 50411900  | 742.91    | MRPS30, HCN1, EMB, PARP8                                                                                                                                                                                                                  |
| 1   | 66833100  | 66772600  | 66952600  | 741.972   | PDE4B                                                                                                                                                                                                                                     |
| 2   | 145109000 | 144689000 | 145219000 | 740.09    | GTDC1, ZEB2                                                                                                                                                                                                                               |
| 11  | 65212900  | 65129200  | 65379700  | 738.826   | KCNK7, MAP3K11, SLC25A45, FRMD8, SCYL1, LTBP3, SSSCA1, FAM89B, EHBP1L1                                                                                                                                                                    |
| 4   | 22923300  | 22826000  | 23196800  | 737.716   | -                                                                                                                                                                                                                                         |
| 14  | 76101700  | 76054700  | 76450300  | 737.296   | FLVCR2, TTL5, C14orf1, IFT43, TGFB3                                                                                                                                                                                                       |
| 2   | 201156000 | 200636000 | 201355000 | 736.589   | C2orf69, TYW5, C2orf47, SPATS2L, KCTD18                                                                                                                                                                                                   |
| 10  | 74730800  | 74007800  | 75399900  | 735.921   | DDIT4, DNAJB12, MICU1, MCU, OIT3, PLA2G12B, P4HA1, NUDT13, ECD, FAM149B1, DNAJC9, MRPS16, TTC18, ANXA7, MSS51, PPP3CB, USP54, MYOZ1                                                                                                       |
| 9   | 88868400  | 88695200  | 89027700  | 733.578   | GOLM1, C9orf153, ISCA1, ZCCHC6                                                                                                                                                                                                            |
| 1   | 98272100  | 97949300  | 98565500  | 731.566   | DPYD                                                                                                                                                                                                                                      |
| 8   | 79211300  | 78656900  | 79554100  | 729.158   | PKIA                                                                                                                                                                                                                                      |
| 12  | 97223900  | 96828100  | 97424100  | 728.739   | NEDD1                                                                                                                                                                                                                                     |
| 11  | 111391000 | 111309000 | 111981000 | 728.464   | POU2AF1, BTG4, C11orf88, LAYN, SIK2, PPP2R1B, ALG9, FDXACB1, C11orf1, CRYAB, HSPB2, C11orf52, C11orf52, DIXDC1, DLAT, PIH1D2, C11orf57, TIMM8B, SDHD                                                                                      |
| 3   | 147223000 | 146941000 | 147360000 | 726.503   | ZIC4, ZIC1                                                                                                                                                                                                                                |
| 15  | 75631100  | 75458200  | 76012400  | 724.9     | C15orf39, GOLGA6C, GOLGA6D, COMMD4, NEIL1, MAN2C1, SIN3A, PTPN9, SNUPN, IMP3, SNX33, CSPG4                                                                                                                                                |
| 1   | 21083000  | 21012100  | 21629100  | 720.302   | KIF17, SH2D5, HP1BP3, EIF4G3, ECE1                                                                                                                                                                                                        |
| 12  | 111254000 | 110248000 | 111324000 | 719.87    | ANKRD13A, C12orf76, IFTS1, ATP2A2, ANAPC7, ARPC3, GPN3, FAM216A, VPS29, RAD9B, PPTC7, TCTN1, HVCN1, PPP1CC, CCDC63, TRPV4, GLTP, TCHP, GIT2                                                                                               |

**Table 6. Overlap between GWAS catalog and catalog of modern human-specific high-frequency changes in the top modern human selected regions.** Chr = chromosome. Pos = position (hg19). ID = SNP rs ID. Hum = Present-day human major allele. Anc = Human-Chimpanzee ancestor allele. Arch = Archaic human allele states (Altai Neanderthal, Denisova) where H=human-like allele and A=ancestral allele. Freq = present-day human derived frequency. Cons = consequence. C = C-score. PubMed = PubMed article ID for GWAS study.

| Chr | Pos       | ID         | Hum | Anc | Arch    | Freq | Gene          | Cons            | C     | GWAS trait                                                | PubMed    |
|-----|-----------|------------|-----|-----|---------|------|---------------|-----------------|-------|-----------------------------------------------------------|-----------|
| 2   | 64279606  | rs10171434 | C   | T   | A/A,A/A | 0.92 | NA            | regulatory      | 8.358 | Suicide attempts in bipolar disorder                      | 21041247  |
| 2   | 64279606  | rs10171434 | C   | T   | A/A,A/A | 0.92 | NA            | regulatory      | 8.358 | Urinary metabolites                                       | 21572414  |
| 2   | 144783214 | rs16823411 | T   | C   | A/A,A/A | 0.93 | GTDC1         | intron          | 4.112 | Body mass index                                           | 21701565  |
| 2   | 144783214 | rs16823411 | T   | C   | A/A,A/A | 0.93 | GTDC1         | intron          | 4.112 | Body mass index                                           | 21701565  |
| 2   | 145213638 | rs731108   | G   | C   | A/A,H/H | 0.92 | ZEB2          | regulatory      | 10.31 | Renal cell carcinoma                                      | 23184150  |
| 2   | 156506516 | rs4407211  | C   | T   | A/A,A/A | 0.92 | NA            | intergenic      | 1.348 | Alcohol consumption                                       | 23953852  |
| 3   | 51142359  | rs4286453  | T   | C   | A/A,A/A | 0.91 | DOCK3         | intron          | 4.96  | Multiple complex diseases                                 | 17554300  |
| 3   | 51824167  | rs6796373  | G   | C   | A/A,A/A | 0.94 | NA            | intergenic      | 1.381 | Response to taxane treatment (placitaxel)                 | 23006423  |
| 3   | 147200492 | rs9876193  | G   | A   | H/H,A/A | 0.95 | ZIC1          | intron,nc       | 6.856 | Type 2 diabetes                                           | 17463246  |
| 4   | 13325741  | rs2867467  | G   | C   | A/A,A/A | 0.91 | NA            | intergenic      | 0.476 | Obesity (extreme)                                         | 21935397  |
| 4   | 13328373  | rs6842438  | T   | C   | A/A,A/A | 0.92 | NA            | intergenic      | 5.241 | Obesity (extreme)                                         | 21935397  |
| 4   | 13330095  | rs10019897 | C   | T   | A/A,A/A | 0.92 | NA            | upstream        | 1.472 | Multiple complex diseases                                 | 17554300  |
| 4   | 13330095  | rs10019897 | C   | T   | A/A,A/A | 0.92 | NA            | upstream        | 1.472 | Obesity (extreme)                                         | 21935397  |
| 4   | 13333413  | rs9996364  | A   | G   | A/A,A/A | 0.92 | HSP90AB2P     | upstream        | 5.865 | Obesity (extreme)                                         | 21935397  |
| 4   | 13338465  | rs11945340 | C   | T   | A/A,A/A | 0.92 | HSP90AB2P     | non coding exon | 12.04 | Obesity (extreme)                                         | 21935397  |
| 4   | 13340249  | rs6839621  | T   | C   | A/A,A/A | 0.92 | HSP90AB2P     | non coding exon | 0.074 | Obesity (extreme)                                         | 21935397  |
| 4   | 13346602  | rs11930614 | C   | T   | A/A,A/A | 0.92 | NA            | intergenic      | 0.587 | Obesity (extreme)                                         | 21935397  |
| 4   | 13350973  | rs10021881 | T   | C   | A/A,A/A | 0.92 | NA            | regulatory      | 3.032 | Obesity (extreme)                                         | 21935397  |
| 4   | 13356393  | rs16888596 | G   | A   | A/A,A/A | 0.94 | NA            | intergenic      | 2.344 | Obesity (extreme)                                         | 21935397  |
| 4   | 13357274  | rs11732938 | A   | G   | A/A,A/A | 0.94 | NA            | intergenic      | 15.45 | Obesity (extreme)                                         | 21935397  |
| 4   | 13360622  | rs11947529 | T   | A   | A/A,A/A | 0.93 | RAB28         | downstream      | 4.356 | Obesity (extreme)                                         | 21935397  |
| 4   | 13363958  | rs12331157 | A   | G   | A/A,A/A | 0.97 | RAB28         | intron          | 1.3   | Obesity (extreme)                                         | 21935397  |
| 4   | 13363974  | rs12332023 | C   | T   | A/A,A/A | 0.97 | RAB28         | intron          | 0.75  | Obesity (extreme)                                         | 21935397  |
| 4   | 13366481  | rs7673680  | C   | T   | A/A,A/A | 0.93 | RAB28         | downstream      | 4.16  | Obesity (extreme)                                         | 21935397  |
| 4   | 13370308  | rs10003958 | T   | C   | A/A,A/A | 0.93 | RAB28         | regulatory      | 16.58 | Obesity (extreme)                                         | 21935397  |
| 4   | 13373583  | rs999851   | C   | T   | A/A,A/A | 0.97 | RAB28         | intron          | 1.305 | Obesity (extreme)                                         | 21935397  |
| 4   | 13374462  | rs9291610  | G   | A   | A/A,A/A | 0.93 | RAB28         | intron          | 3.264 | Obesity (extreme)                                         | 21935397  |
| 4   | 13393897  | rs9998914  | A   | T   | A/A,A/A | 0.96 | RAB28         | intron          | 0.414 | Obesity (extreme)                                         | 21935397  |
| 4   | 13403855  | rs11943295 | G   | A   | A/A,A/A | 0.94 | RAB28         | intron          | 1.702 | Multiple complex diseases                                 | 17554300  |
| 4   | 13403855  | rs11943295 | G   | A   | A/A,A/A | 0.94 | RAB28         | intron          | 1.702 | Obesity (extreme)                                         | 21935397  |
| 4   | 13403998  | rs11943330 | G   | A   | A/A,A/A | 0.93 | RAB28         | intron          | 3.295 | Obesity (extreme)                                         | 21935397  |
| 4   | 13404130  | rs7677336  | G   | T   | A/A,A/A | 0.94 | RAB28         | intron          | 0.752 | Obesity (extreme)                                         | 21935397  |
| 4   | 13404717  | rs7677332  | A   | C   | A/A,A/A | 0.93 | RAB28         | intron          | 0.702 | Obesity (extreme)                                         | 21935397  |
| 4   | 13440031  | rs11737264 | C   | G   | A/A,A/A | 0.93 | RAB28         | intron          | 1.159 | Obesity (extreme)                                         | 21935397  |
| 4   | 13440271  | rs11737360 | C   | T   | A/A,A/A | 0.94 | RAB28         | intron          | 2.745 | Obesity (extreme)                                         | 21935397  |
| 4   | 13449532  | rs16888654 | A   | C   | A/A,A/A | 0.94 | RAB28         | intron          | 0.46  | Obesity (extreme)                                         | 21935397  |
| 4   | 13452022  | rs16888661 | C   | A   | A/A,A/A | 0.91 | RAB28         | intron          | 5.359 | Obesity (extreme)                                         | 21935397  |
| 4   | 13463991  | rs11933841 | T   | C   | A/A,A/A | 0.93 | RAB28         | intron          | 4.193 | Obesity (extreme)                                         | 21935397  |
| 4   | 13465710  | rs11947665 | T   | A   | A/A,A/A | 0.93 | RAB28         | intron          | 4.41  | Obesity (extreme)                                         | 21935397  |
| 4   | 23095293  | rs6825402  | C   | T   | A/A,A/A | 0.96 | NA            | intergenic      | 2.599 | Multiple complex diseases                                 | 17554300  |
| 5   | 45393261  | rs6874279  | G   | A   | A/A,A/A | 0.93 | HCN1          | intron          | 1.47  | Alcohol dependence                                        | 20201924  |
| 5   | 45393261  | rs6874279  | G   | A   | A/A,A/A | 0.93 | HCN1          | intron          | 1.47  | Alcoholism                                                | pha002891 |
| 5   | 89540468  | rs2935504  | C   | T   | A/A,A/A | 0.97 | RP11-61G23.1  | non coding exon | 4.52  | Multiple complex diseases                                 | 17554300  |
| 7   | 106720932 | rs12154324 | G   | A   | A/A,A/A | 0.93 | NA            | regulatory      | 5.411 | Multiple complex diseases                                 | 17554300  |
| 13  | 44978167  | rs9525954  | C   | A   | A/A,A/A | 0.95 | RP11-269C23.3 | intron          | 2.731 | Type 2 diabetes                                           | 17463246  |
| 13  | 45034814  | rs9533862  | G   | C   | A/A,A/A | 0.93 | FILIP1LP1     | intron          | 2.026 | Suicide attempts in bipolar disorder                      | 21041247  |
| 13  | 45055091  | rs17065868 | T   | C   | A/A,A/A | 0.92 | FILIP1LP1     | intron          | 3.214 | Antineutrophil cytoplasmic antibody-associated vasculitis | 22808956  |

# Figures

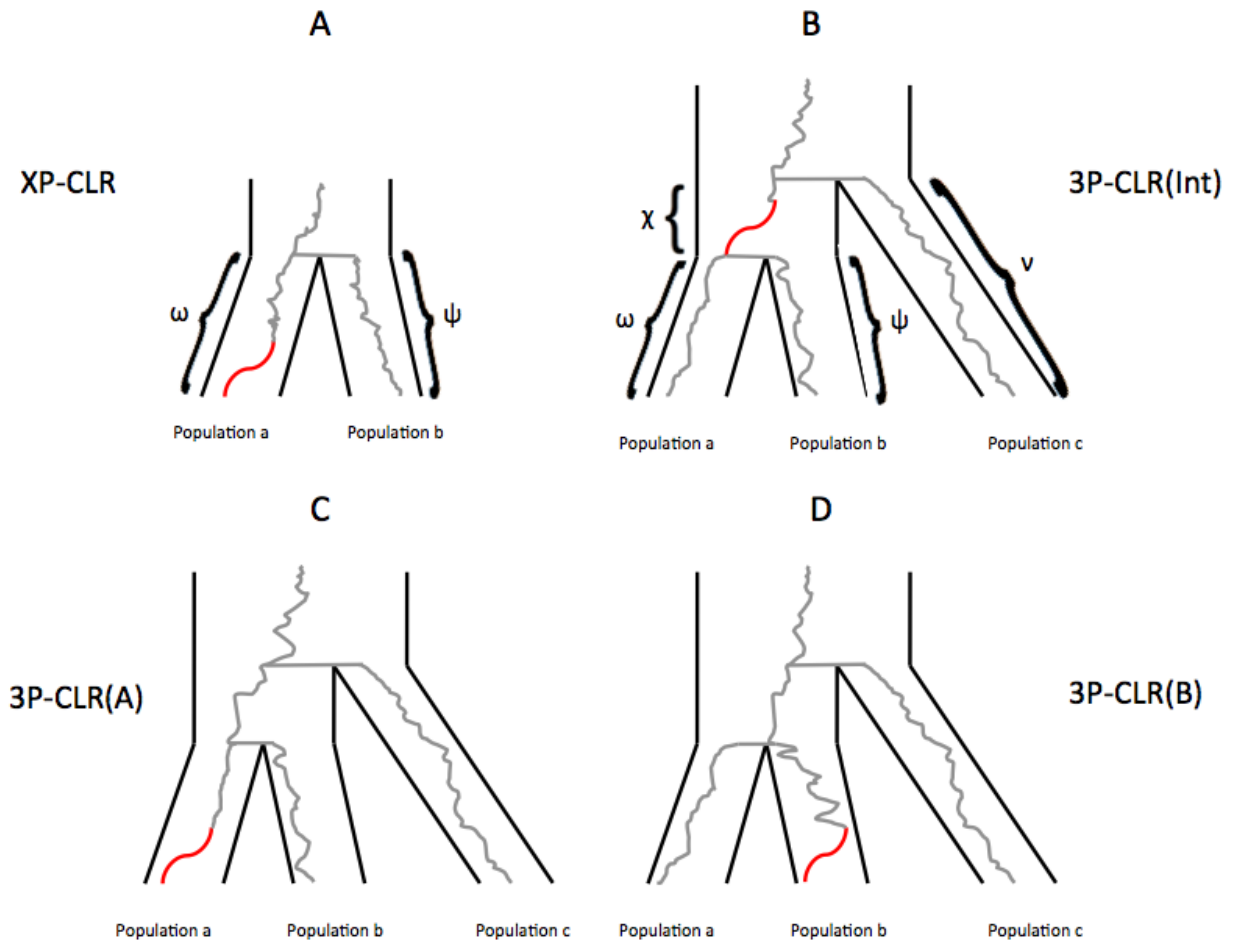

**Figure 1. Schematic tree of selective sweeps detected by XP-CLR and 3P-CLR.** While XP-CLR can only use two populations (an outgroup and a test) to detect selection (panel A), 3P-CLR can detect selection in the ancestral branch of two populations (3P-CLR(Int), panel B) or on the branches specific to each population (3P-CLR(A) and 3P-CLR(B), panels C and D, respectively). The greek letters denote the known drift times for each branch of the population tree.



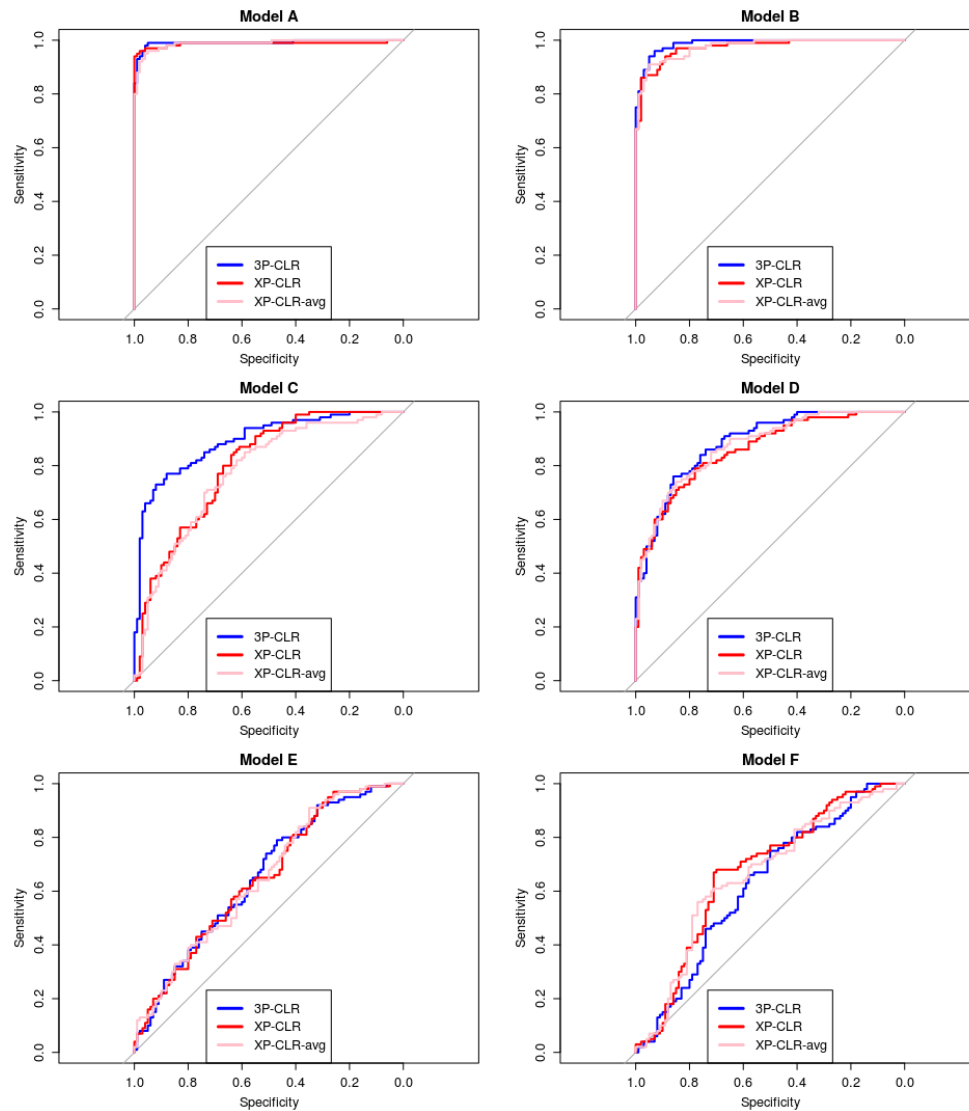

**Figure 2.** ROC curves for performance of 3P-CLR(Int) and two variants of XP-CLR in detecting selective sweeps that occurred before the split of two populations *a* and *b*, under different demographic models. In this case, the outgroup panel from population *c* contained 10 haploid genomes. The two sister population panels (from *a* and *b*) have 100 haploid genomes each.

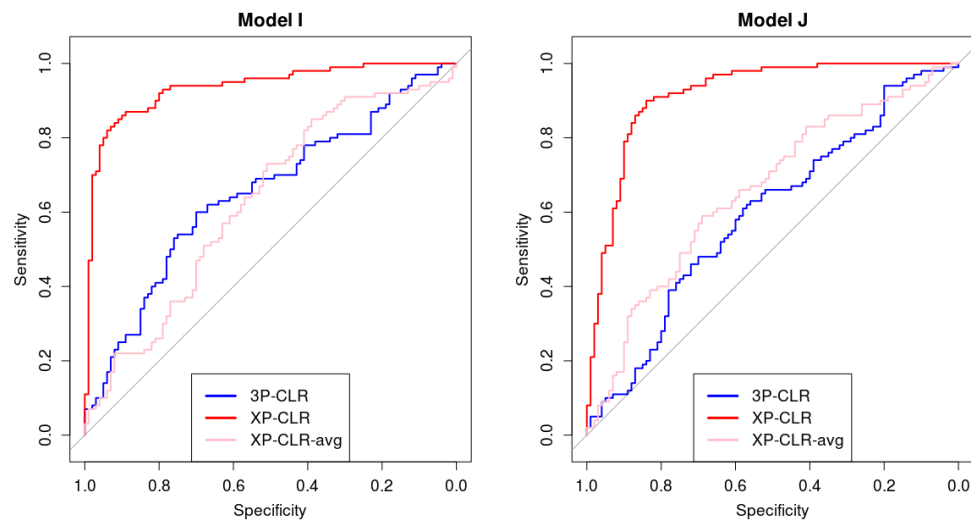

**Figure 3.** 3P-CLR(Int) is tailored to detect selective events that happened before the split  $t_{ab}$ , so it is largely insensitive to sweeps that occurred after the split. ROC curves show performance of 3P-CLR(Int) and two variants of XP-CLR for models where selection occurred in population  $a$  after its split from  $b$ .

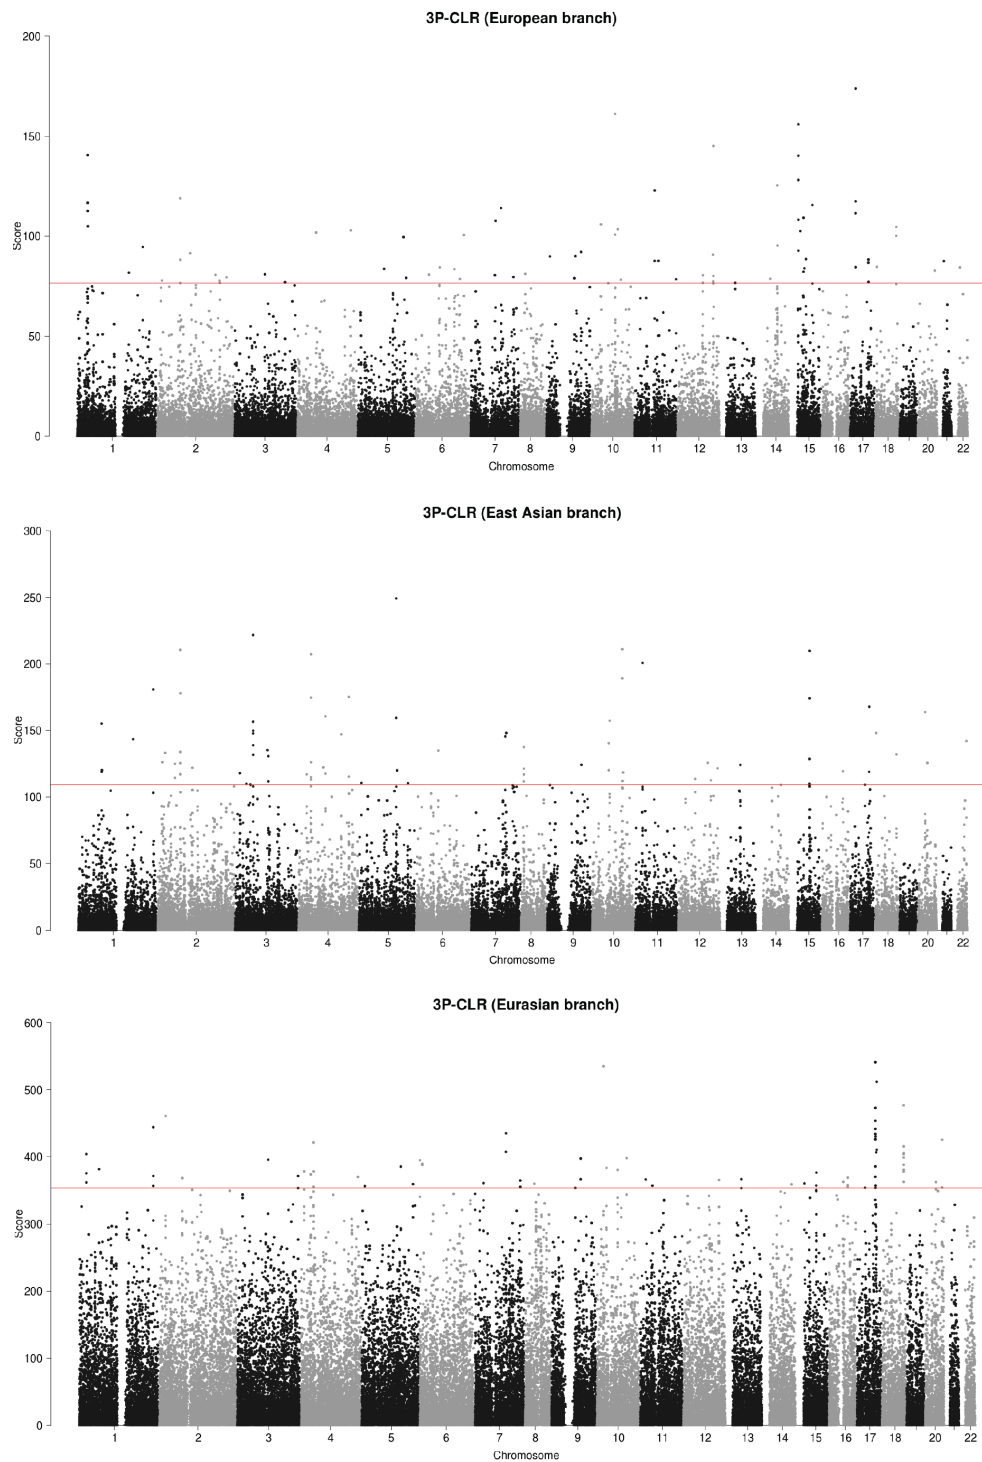

**Figure 4.** 3P-CLR scan of Europeans (upper panel), East Asians (middle panel) and the ancestral population to Europeans and East Asians (lower panel), using Africans as the outgroup in all 3 cases. The red line denotes the 99.9% quantile cutoff.

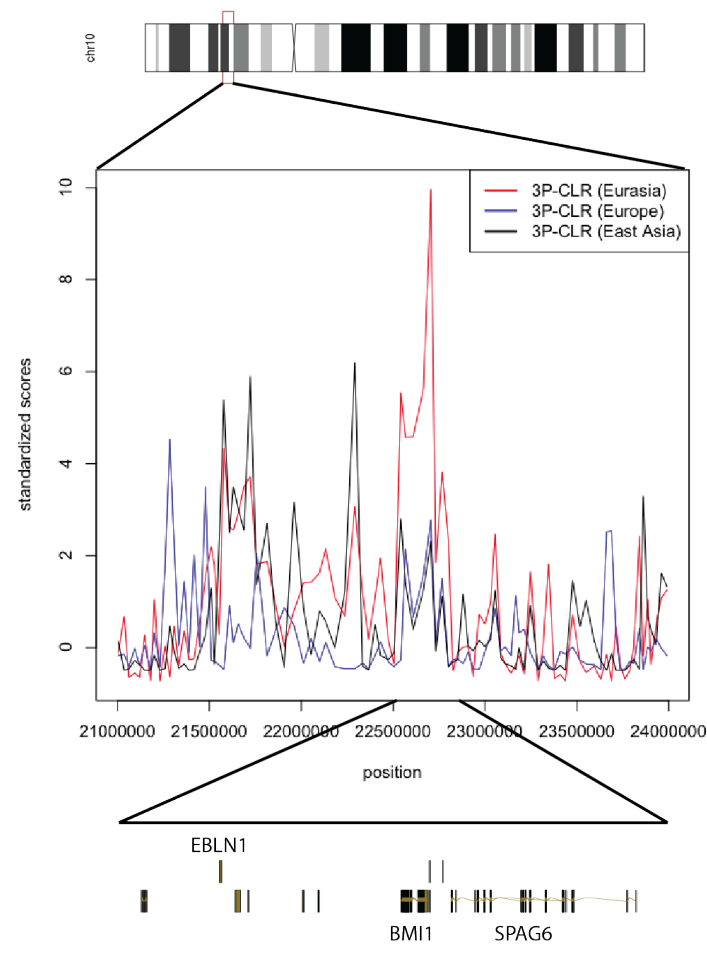

**Figure 5. 3P-CLR scan of Europeans (blue), East Asians (black) and the ancestral Eurasian population (red) reveals the region containing genes SPAG6 and BMI1 to be candidates for selection in the ancestral population.** To make a fair comparison, all 3P-CLR scores were standardized by subtracting the chromosome-wide mean from each window and dividing the resulting score by the chromosome-wide standard deviation. The image was built using the GenomeGraphs package in Bioconductor.

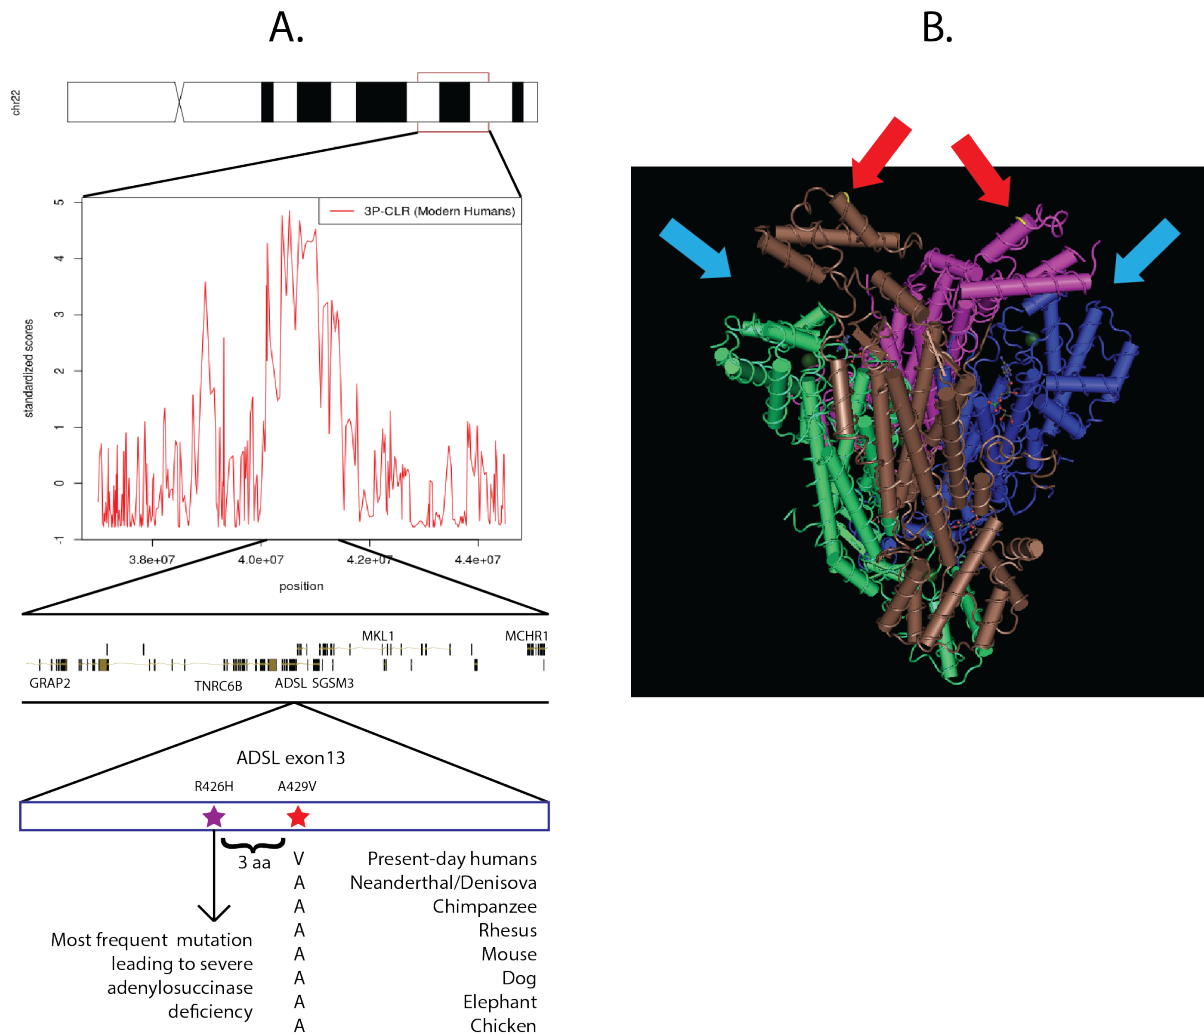

**Figure 6. ADSL is a candidate for selection in the modern human lineage, after the split from Neanderthal and Denisova.** A) One of the top-scoring regions when running 3P-CLR on the modern human lineage contains genes TNRC6B, ADSL, MKL1, MCHR1, SGSM3 and GRAP2. The most disruptive nonsynonymous modern-human-specific change in the entire list of top regions is in an exon of ADSL and is fixed derived in all present-day humans but ancestral in archaic humans. It is highly conserved across tetrapods and lies only 3 residues away from the most common mutation leading to severe adenylosuccinase deficiency. B) The gene codes for a tetrameric protein. The mutation is in the C-terminal domain of each tetramer (red arrows), which are near the active sites (light blue arrows). Scores in panel A were standardized using the chromosome-wide mean and standard deviation. Vertebrate alignments were obtained from the UCSC genome browser (Vertebrate Multiz Alignment and Conservation track) and the image was built using the GenomeGraphs package in Bioconductor and Cn3D.

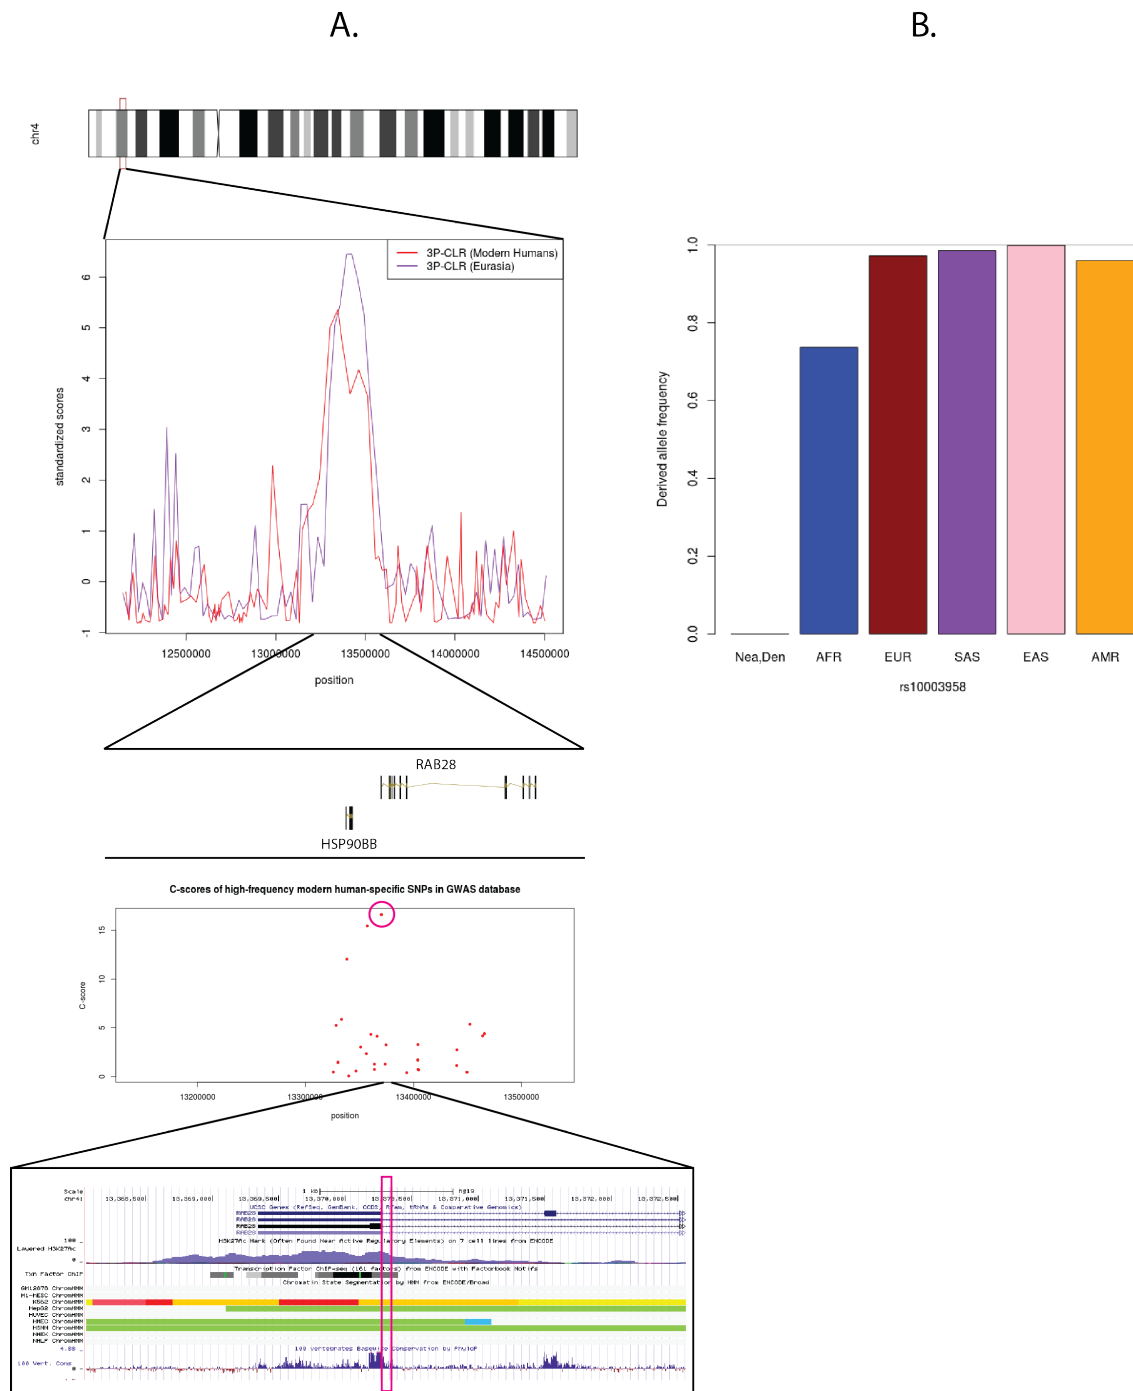

**Figure 7. RAB28 is a candidate for selection in both the Eurasian and the modern human ancestral lineages.** A) The gene lies in the middle of a 3P-CLR peak for both ancestral populations. The putatively selected region also contains several SNPs that are significantly associated with obesity and that are high-frequency derived in present-day humans (> 93%) but ancestral in archaic humans (red dots). The SNP with the highest C-score among these (rs10003958, pink circle) lies in a highly conserved strong enhancer region adjacent to the last exon of the gene. Color code for ChromHMM segmentation regions in UCSC genome browser: red = promoter, orange = strong enhancer, yellow = weak enhancer, green = weak transcription, blue = insulator. The image was built using the GenomeGraphs package in Bioconductor and the UCSC Genome Browser. B) Derived allele frequencies of SNP rs10003958 in the Denisova and Neanderthal genomes, and in different 1000 Genomes continental populations. AFR = Africans. AMR = Native Americans. SAS = South Asians. EUR = Europeans. EAS = East Asians.

# Supplementary Figures

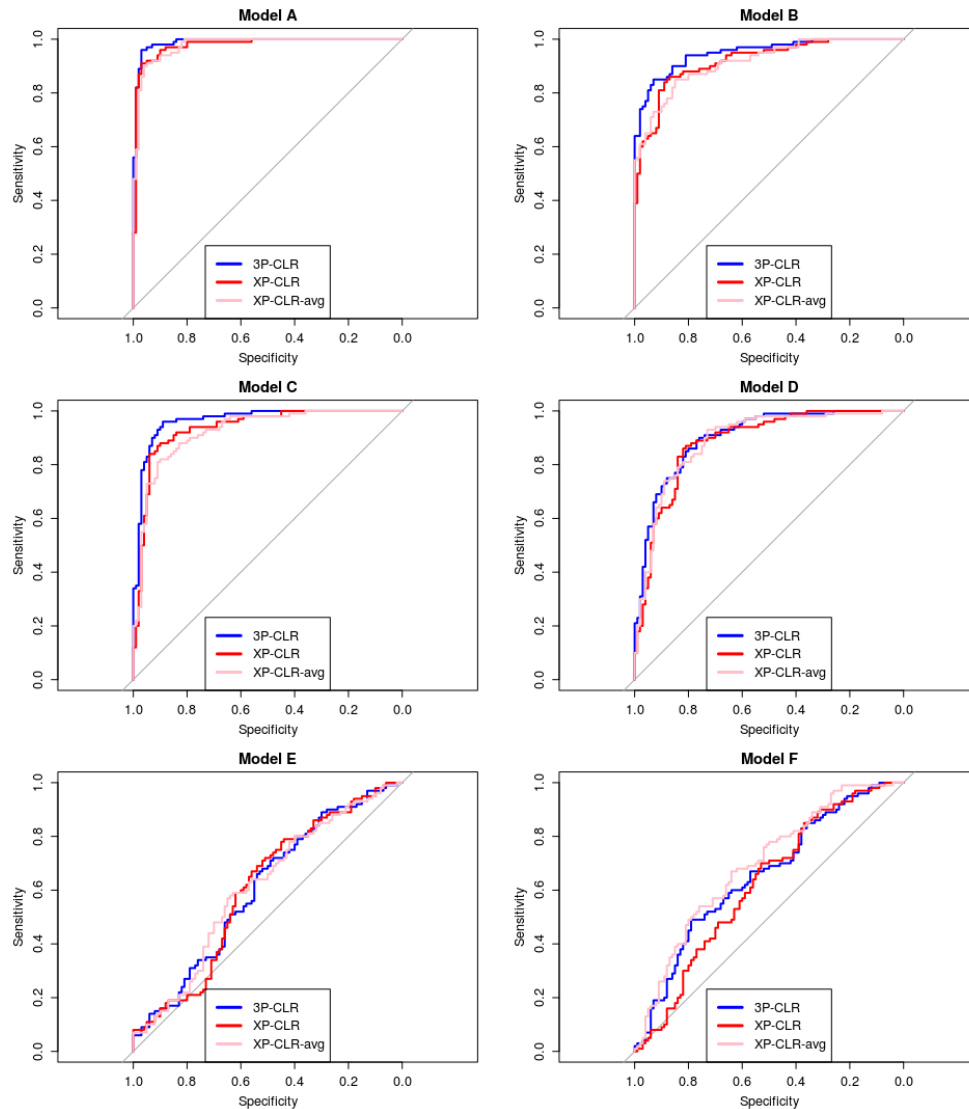

**Figure S1. ROC curves for performance of 3P-CLR(Int) and two variants of XP-CLR in detecting selective sweeps that occurred before the split of two populations *a* and *b*, under different demographic models.** In this case, the outgroup panel from population *c* contained 100 haploid genomes. The two sister population panels (from *a* and *b*) have 100 haploid genomes each.

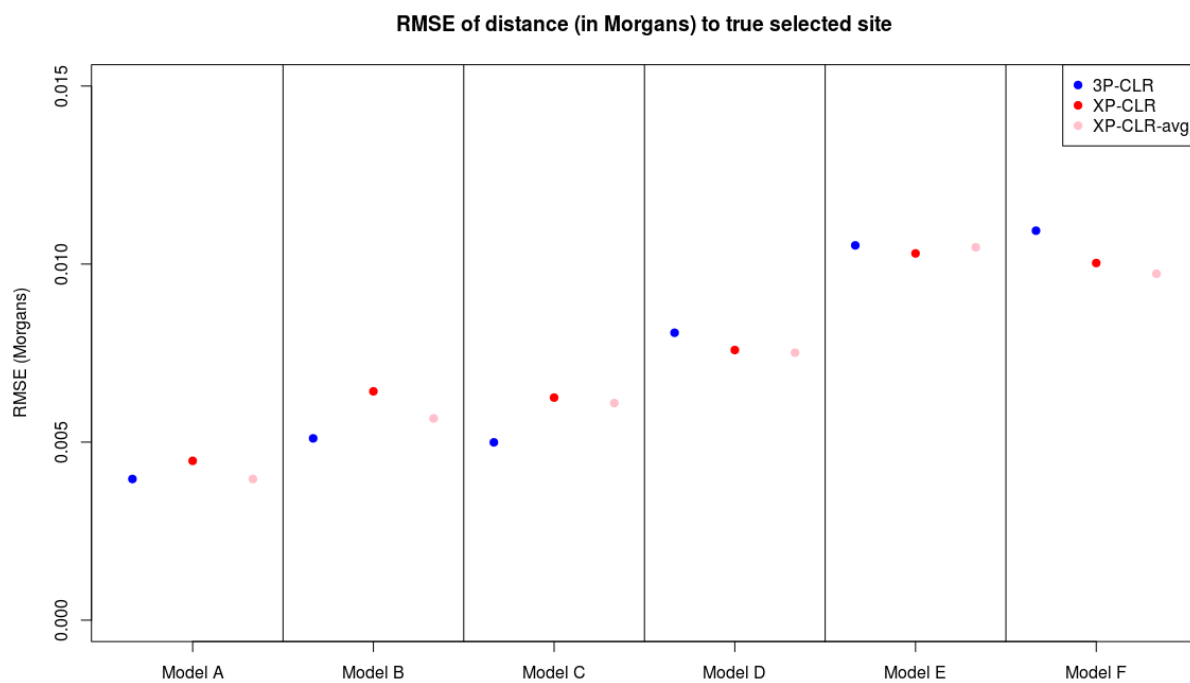

**Figure S2. Root-mean squared error for the location of the sweep inferred by 3P-CLR(Int) and two variants of XP-CLR under different demographic scenarios.** In this case, the outgroup panel from population *c* contained 10 haploid genomes and the two sister population panels (from *a* and *b*) have 100 haploid genomes each.



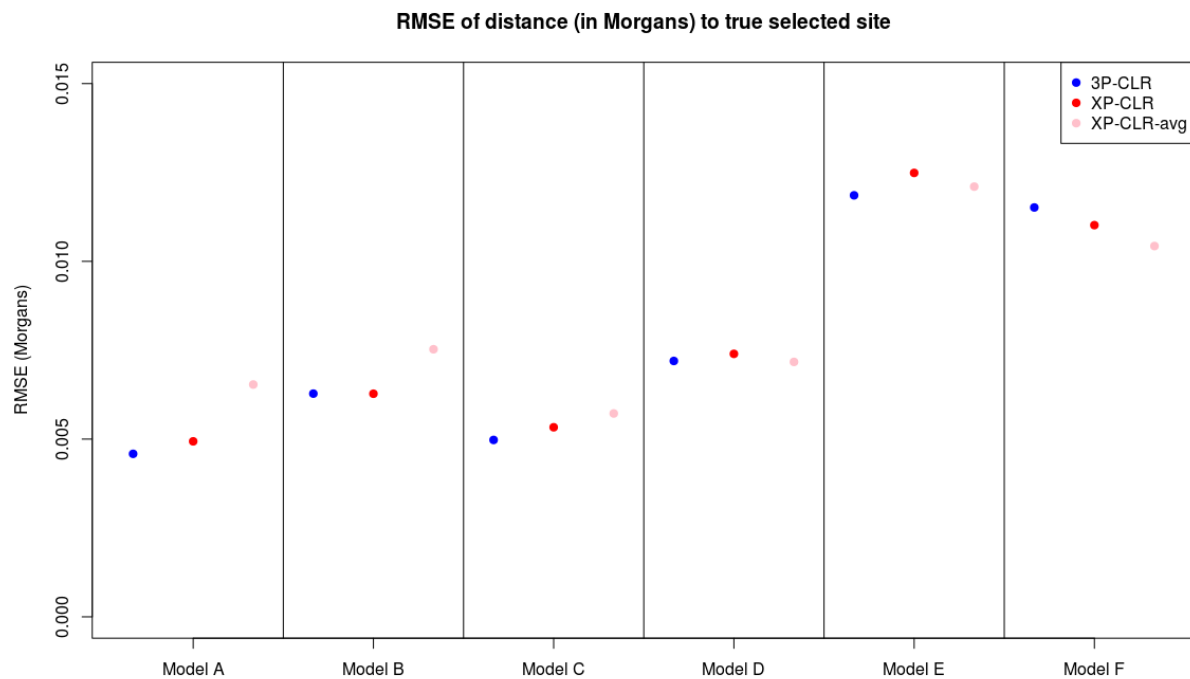

**Figure S3. Root-mean squared error for the location of the sweep inferred by 3P-CLR(Int) and two variants of XP-CLR under different demographic scenarios.** In this case, the outgroup panel from population *c* contained 100 haploid genomes and the two sister population panels (from *a* and *b*) have 100 haploid genomes each.

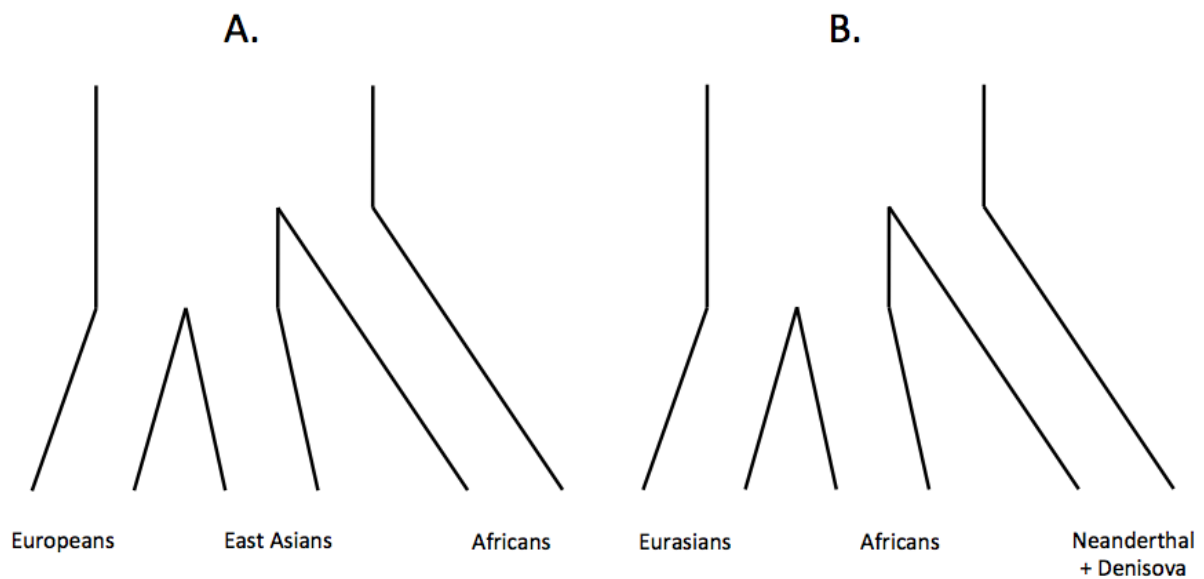

**Figure S4. A. Three-population tree separating Europeans, East Asians and Africans. B. Three-population tree separating Eurasians, Africans and archaic humans (Neanderthal+Denisova).**

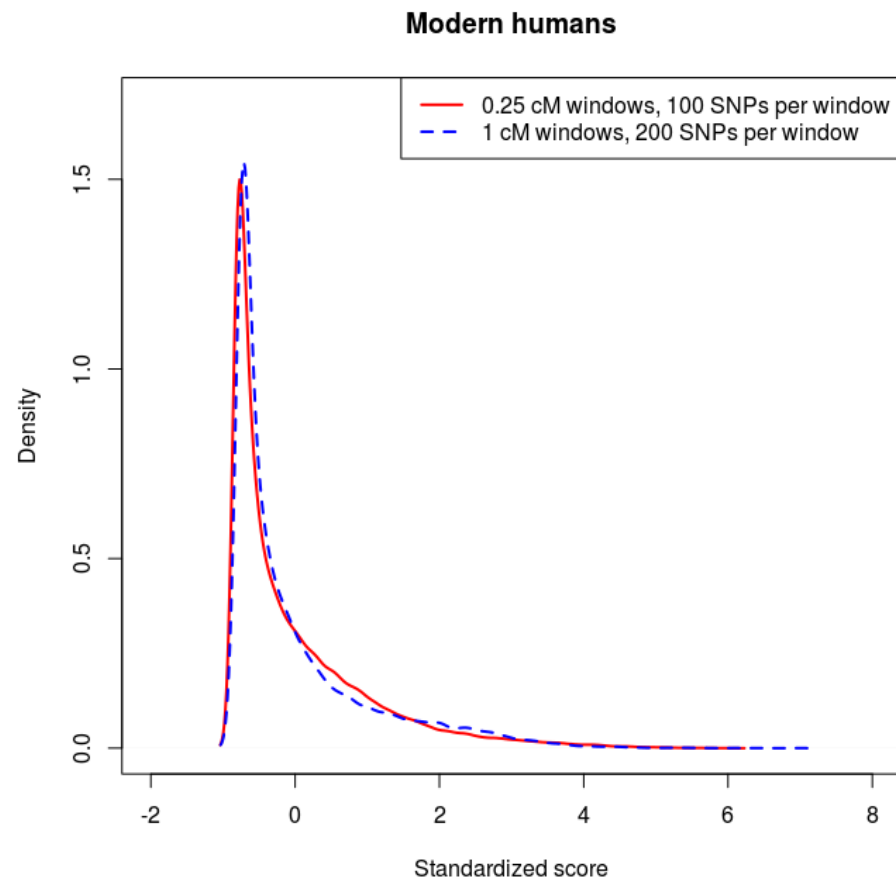

**Figure S5. Comparison of 3P-CLR on the modern human ancestral branch under different window sizes and central SNP spacing.** The red density is the density of standardized scores for 3P-CLR run using 0.25 cM windows, 100 SNPs per window and a spacing of 20 SNPs between each central SNP. The blue dashed density is the density of standardized scores for 3P-CLR run using 1 cM windows, 200 SNPs per window and a spacing of 80 SNPs between each central SNP.

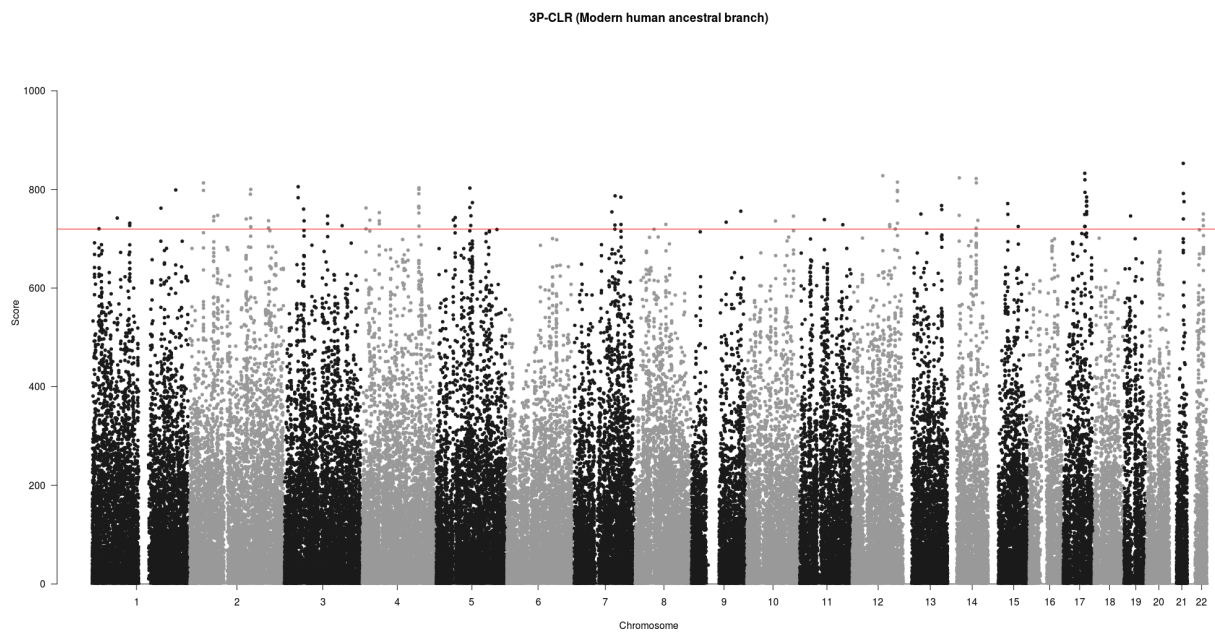

**Figure S6. 3P-CLR scan of the ancestral branch to Africans and Eurasians, using the Denisovan and Neanderthal genomes as the outgroup. The red line denotes the 99.9% quantile cutoff.**

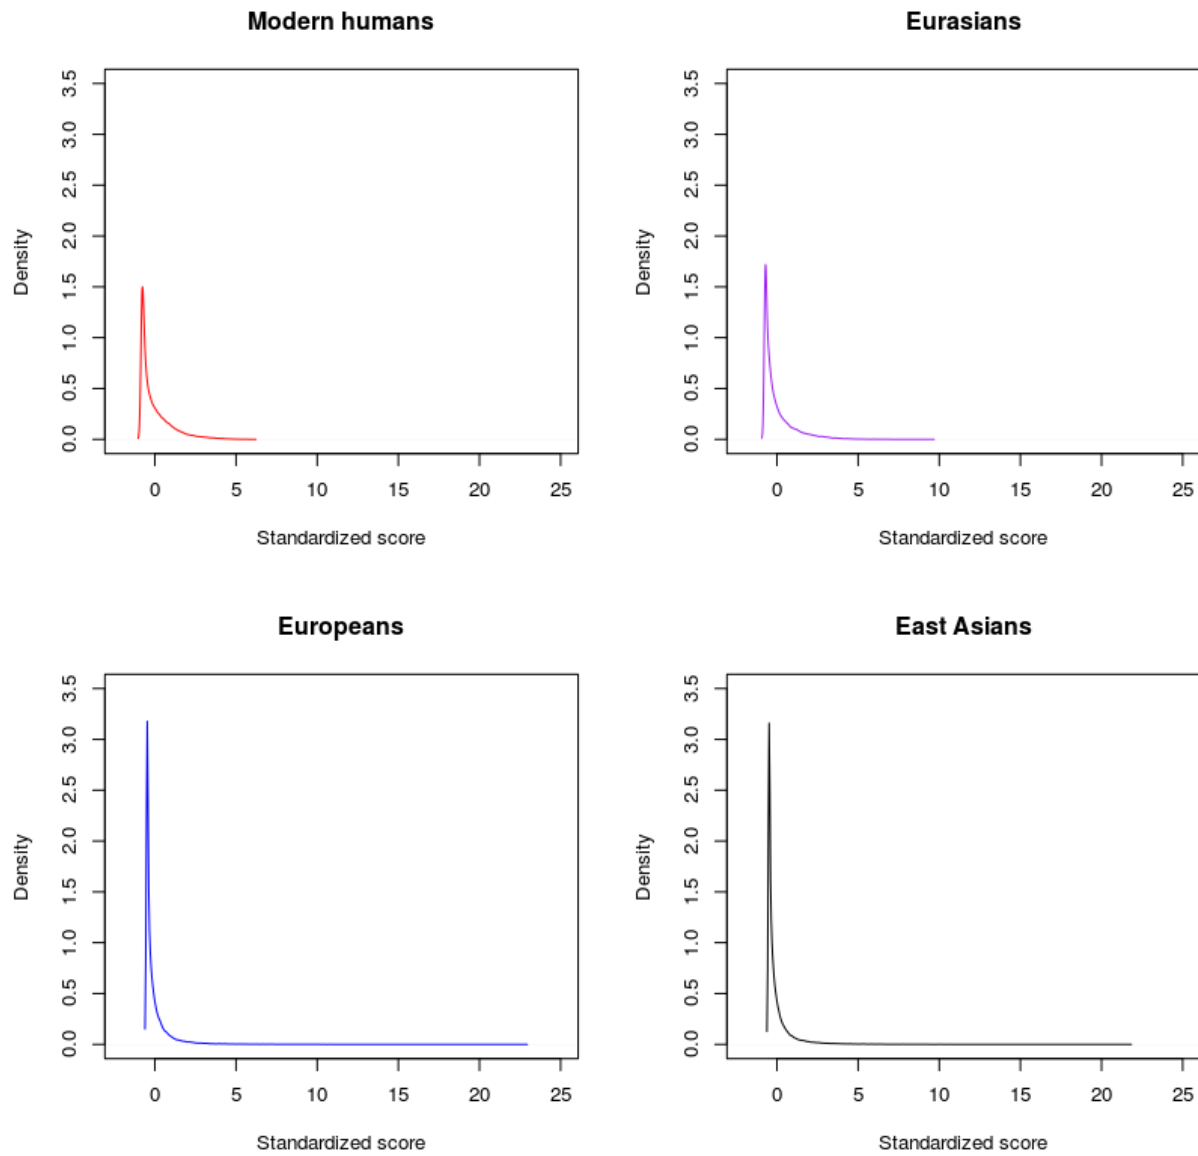

**Figure S7. Genome-wide densities of each of the 3P-CLR scores described in this work.** The distributions of scores testing for recent selection (Europeans and East Asians) have much longer tails than the distributions of scores testing for more ancient selection (Modern Humans and Eurasians). All scores were standardized using their genome-wide means and standard deviations.
